# Supplementary material for: Effect of proton sources on the electrocatalytic hydrogen evolution reaction mediated by a copper complex of bistriazolylpyridine
Source: Royal Society of Chemistry journal article supplement (doi:10.1039/d4dt02856b), 2025-01-01
Supplement: d4dt02856b1.pdf [file d4dt02856b1.pdf]

## Supplementary Information

### Effect of proton sources on the electrocatalytic hydrogen evolution reaction mediated by a copper complex of bistriazolylpyridine

Gui-Shan Chen,<sup>a</sup> Chang Liu,<sup>a</sup> Xing-Jin Yang,<sup>a</sup> Zhi-Hao Zhan,<sup>a</sup> Tian-Shun Wang<sup>a,b</sup> and  
Hua-Xin Zhang<sup>a,\*</sup>

*<sup>a</sup>School of Chemistry and Chemical Engineering, Guangxi University, No. 100,*

*Daxue East Road, Nanning 530004, Guangxi, China*

*<sup>b</sup>Research Institute of Agro-Products Quality Safety and Testing Technology, Guangxi*

*Academy of Agriculture Science, Nanning 530007, Guangxi, China*

---

\* Corresponding author.  
E-mail address: [zhanghx@gxu.edu.cn](mailto:zhanghx@gxu.edu.cn) (H.-X. Zhang).

## Physical Measurements

The UV-Vis absorption spectra were recorded with Shimadzu UV2600 spectrophotometer. Infrared spectra were measured using the Perkin Elmer Frontier FT-IR spectrometer.  $^1\text{H}$  and  $^{13}\text{C}$  NMR spectra were obtained using the AVANCE III HD500 spectrometer. Elementary analyses (C, H, N) were performed on a Perkin–Elmer model 240C automatic instrument. SEM images were observed with a Hitachi S-4800 field emission scanning electron microscope and the EDS data were obtained with an X-Max Extreme spectrometer. Mass spectrometric analyses were conducted using an Agilent 1260-6545LC-Q-TOF mass spectroscopy with a positive-ion electrospray ionization mode. The powder X-ray diffraction (PXRD) data were measured using a Rigaku D/MAX 2500 V diffractometer. The X-ray photoelectron spectroscopy (XPS) data and the valence states of the metal elements were probed using a Thermo Scientific Nexsa instrument.

## Crystal structure determination

A single crystal of Cudbes was mounted on a glass fibre and measured using graphite monochrome Mo- $K_{\alpha}$  radiation ( $\lambda = 0.71073 \text{ \AA}$ ) on an Enraf-Nonius single crystal CAD-4 diffractometer. The data were collected at a temperature of 296 K with a maximum  $2\theta$  value of 51.58 for Cudbes. Experience absorption correction is applied using the SADABS program.<sup>1</sup> The structure was solved by direct method and refined by full-matrix least square method on  $F^2$  using SHELXTL program.<sup>2</sup> ORTEP was used to draw the molecular structure.<sup>3</sup> CCDC2339302 contains the supplementary crystallographic data for Cudbes.

## Electrochemical measurements

Electrochemical measurements were carried out in an airtight H-shaped electrochemical cell using a potentiostat CHI760E with a glassy carbon (GC) working electrode (diameter: 3.0 mm) at room temperature. Pt mesh is used as the counter electrode. Ag pseudo-reference electrode is a silver wire immersed in electrolyte solutions (0.1 M TBAPF<sub>6</sub> and 0.01 M AgNO<sub>3</sub> solutions) and separated from other electrodes by Vycor glass. The Fc<sup>+</sup>/Fc<sup>0</sup> ( $E_{1/2} = 0.09 \text{ V}$ ) was used as an internal reference electrode. Anhydrous 0.1 M TBAPF<sub>6</sub> CH<sub>3</sub>CN solution was used as an electrolyte in all measurements. The concentration of the complex was 0 - 1.0 mM. The peak potential of irreversible redox process was determined by differential pulse voltammetry

All controlled potential electrolysis (CPE) experiments were carried out in an inert atmosphere with membrane-separated, gas-tight two-compartment glass cells. Experiments were conducted

using a potentiostat CHI760E with a GC working electrode (diameter: 6.0 mm). Pt mesh was used as the counter electrode. The potential was recorded with respect to the Ag pseudo-reference electrode (0.1 M TBAPF<sub>6</sub> and 0.01 M AgNO<sub>3</sub> solution).

The Faradaic efficiency was determined from the calibration curve derived from the H<sub>2</sub> gas standard and further quantified by gas chromatography on the Fuli 9790II instrument equipped with a 5 Å molecular sieve column, thermal conductivity detector and argon carrier gas.

### **Determination of the overpotential ( $\eta$ ) and the Faradaic efficiency (FE)**

The overpotential ( $\eta$ ) was calculated according to Eq. S1.<sup>4</sup> Where  $E_{\text{cat}/2}$  is the catalytic half-wave potential,  $E_{\text{HA}}^0$  can be calculated by the Nernst equation as shown in Eq. S2.  $E_{\text{H}^+}^0$  is the electrode potential of the standard hydrogen electrode (H<sup>+</sup>/H<sub>2</sub>), which is -0.028 V in acetonitrile,<sup>5</sup> and pK<sub>a</sub> is the dissociation constant in a given acid solution.

$$\eta = |E_{\text{cat}/2} - E_{\text{HA}}^0| \quad (\text{S1})$$

$$E_{\text{HA}}^0 = E_{\text{H}^+}^0 - (2.303RT/F)\text{pK}_a = -0.028 - 0.0591 \times \text{pK}_a \quad (\text{S2})$$

Using the values pK<sub>a,AcOH</sub> = 22.3, pK<sub>a,TFA</sub> = 12.7 and pK<sub>a,TsOH</sub> = 8.7, the thermodynamic potential  $E_{\text{AcOH}}^0$  is calculated to be -1.35 V,  $E_{\text{TFA}}^0$  is calculated to be -0.78 V, and  $E_{\text{TsOH}}^0$  is calculated to be -0.54 V.

In the CPE experiments, the Faradaic efficiency (FE) of the HER catalyzed by Cudbes was calculated by Eq. S3.<sup>6</sup>

$$\text{Faradaic efficiency} = n_{\text{H}_2} F/Q \times 100 \% \quad (\text{S3})$$

Where  $n_{\text{H}_2}$  represents the number of moles of H<sub>2</sub> generated during electrolysis,  $z$  represents the number of electrons per mole of H<sub>2</sub> (= 2),  $F$  represents the Faraday constant (= 96500) and  $Q$  represents the total amount of charge accumulated during one hour electrocatalysis.

**Table S1** Crystallographic data and structural refinement parameters for Cudbes.

| Complex                                             | Cudbes                                                                            |
|-----------------------------------------------------|-----------------------------------------------------------------------------------|
| Empirical formula                                   | C <sub>30</sub> H <sub>30</sub> Cl <sub>2</sub> CuN <sub>14</sub> O <sub>16</sub> |
| Formula weight                                      | 977.12                                                                            |
| Temperature / K                                     | 296(2)                                                                            |
| Crystal system                                      | monoclinic                                                                        |
| Space group                                         | <i>P</i> 2(1)/n                                                                   |
| <i>a</i> / Å                                        | 22.155(3)                                                                         |
| <i>b</i> / Å                                        | 12.3764(17)                                                                       |
| <i>c</i> / Å                                        | 30.424(4)                                                                         |
| <i>Z</i>                                            | 8                                                                                 |
| <i>α</i> / °                                        | 90                                                                                |
| <i>β</i> / °                                        | 102.455(3)                                                                        |
| <i>γ</i> / °                                        | 90                                                                                |
| Crystal size / mM                                   | 0.23 × 0.20 × 0.15                                                                |
| Absorption coefficient / mM <sup>-1</sup>           | 0.756                                                                             |
| <i>h</i>                                            | -26 ≤ <i>h</i> ≤ 27                                                               |
| <i>k</i>                                            | -15 ≤ <i>k</i> ≤ 13                                                               |
| <i>l</i>                                            | -37 ≤ <i>l</i> ≤ 37                                                               |
| <i>F</i> (000)                                      | 3992                                                                              |
| <i>θ</i> for data collection / °                    | 1.371~25.788                                                                      |
| Reflections collected / unique                      | 19103 / 7445 [R(int) = 0.0253]                                                    |
| Data / restraints / parameters                      | 7784 / 0 / 568                                                                    |
| Goodness-of-fit on <i>F</i> <sup>2</sup>            | 0.789                                                                             |
| Final <i>R</i> indices [ <i>I</i> > 2σ( <i>I</i> )] | R <sub>1</sub> = 0.0549, wR <sub>2</sub> = 0.1707                                 |

**Table S2** Bond lengths (Å) and bond angles (°) for Cudbes .

|            |            |            |            |
|------------|------------|------------|------------|
| Cu1-N1     | 2.006(3)   | Cu1-N2     | 2.346(3)   |
| Cu1-N5     | 2.280(3)   | Cu1-N8     | 1.976(3)   |
| Cu1-N9     | 2.104(3)   | Cu1-N12    | 2.095(3)   |
| N8-Cu1-N1  | 175.94(11) | N8-Cu1-N12 | 79.60(12)  |
| N1-Cu1-N12 | 98.30(11)  | N1-Cu1-N9  | 103.54(12) |
| N8-Cu1-N5  | 98.79(11)  | N1-Cu1-N5  | 77.50(11)  |
| N12-Cu1-N5 | 85.00(11)  | N9-Cu1-N5  | 99.79(12)  |
| N8-Cu1-N2  | 106.82(11) | N1-Cu1-N2  | 77.00(11)  |
| N12-Cu1-N2 | 102.99(11) | N9-Cu1-N2  | 81.99(12)  |
| N5-Cu1-N2  | 154.12(11) | N8-Cu1-N9  | 78.61(13)  |
| N12-Cu1-N9 | 158.15(13) |            |            |

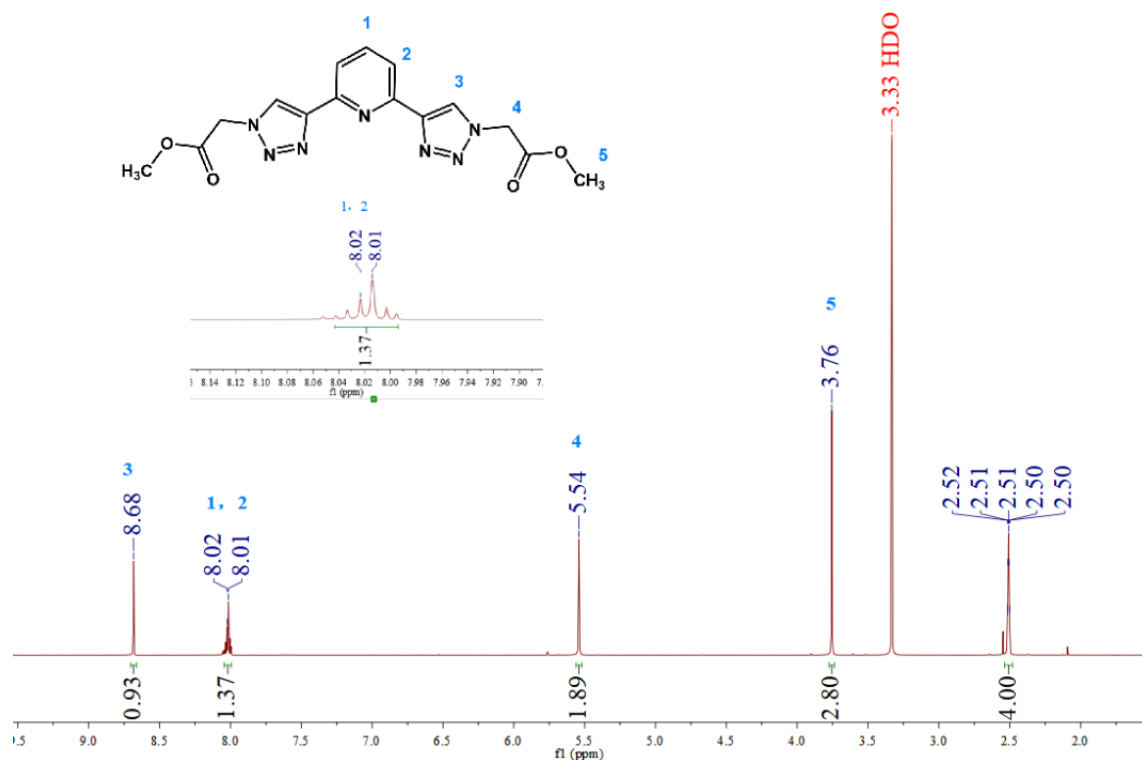

Fig. S1  $^1\text{H}$  NMR of dbes in  $\text{CDCl}_3$

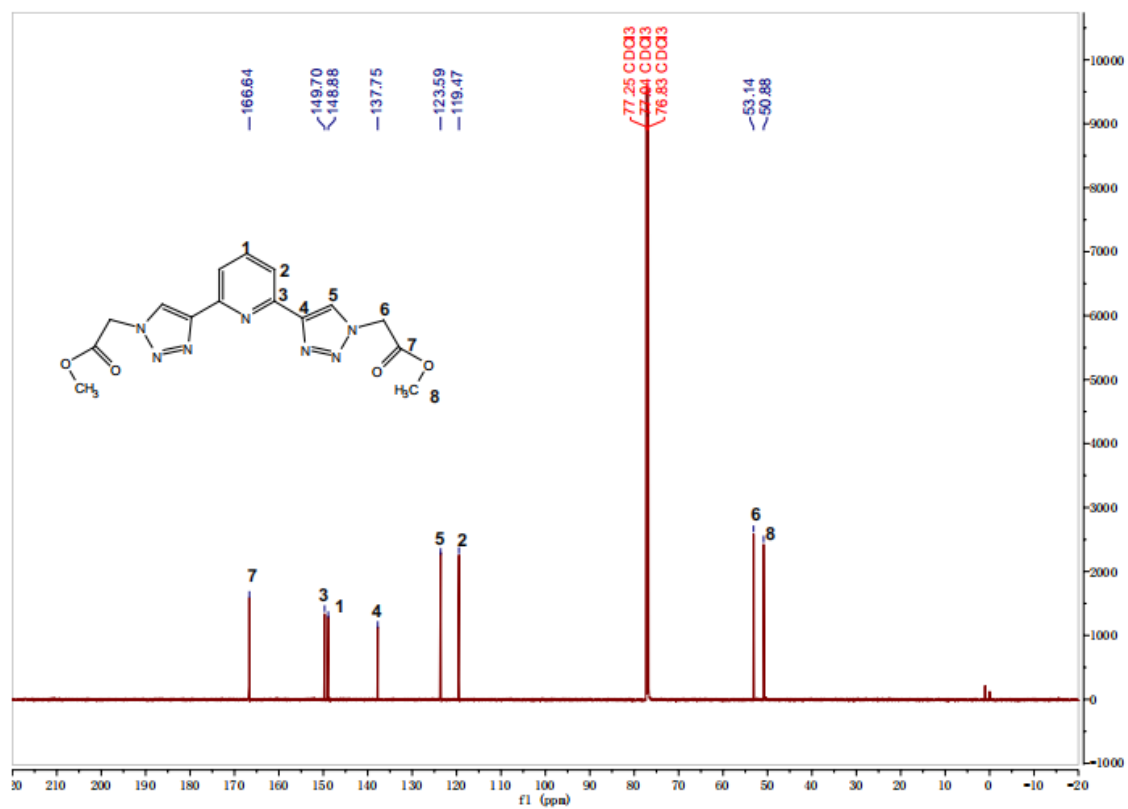

Fig. S2  $^{13}\text{C}$  NMR of dbes in  $\text{CDCl}_3$

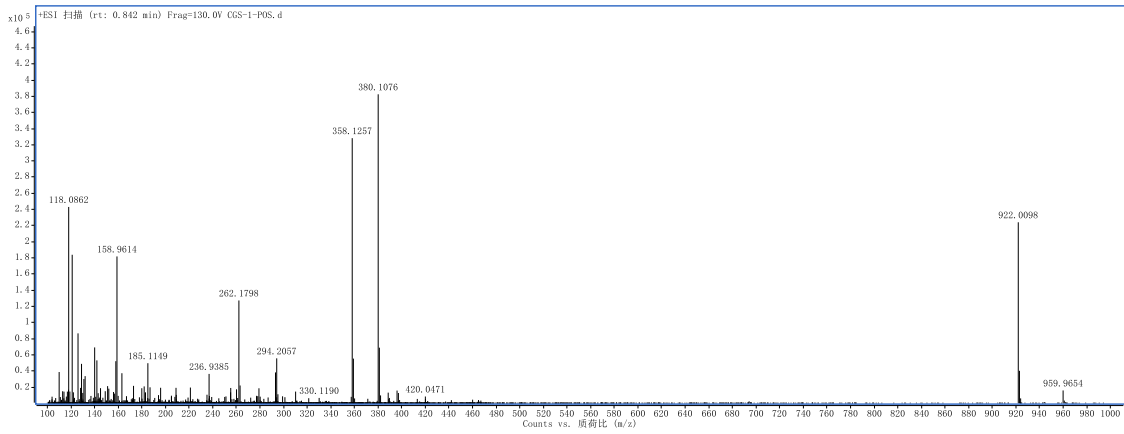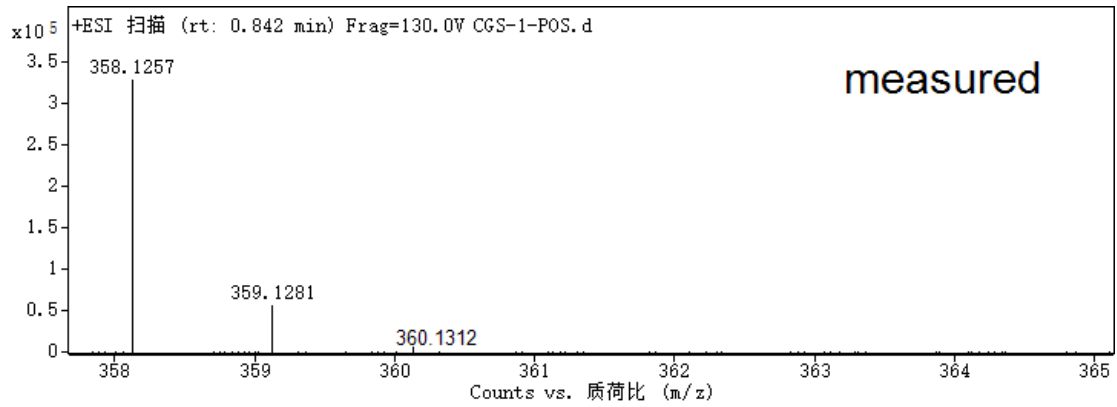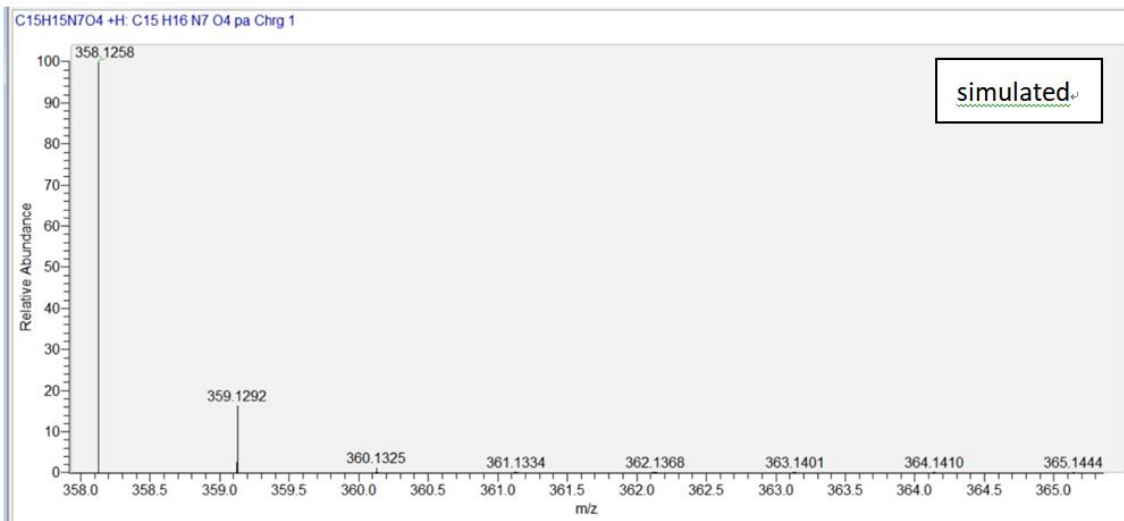

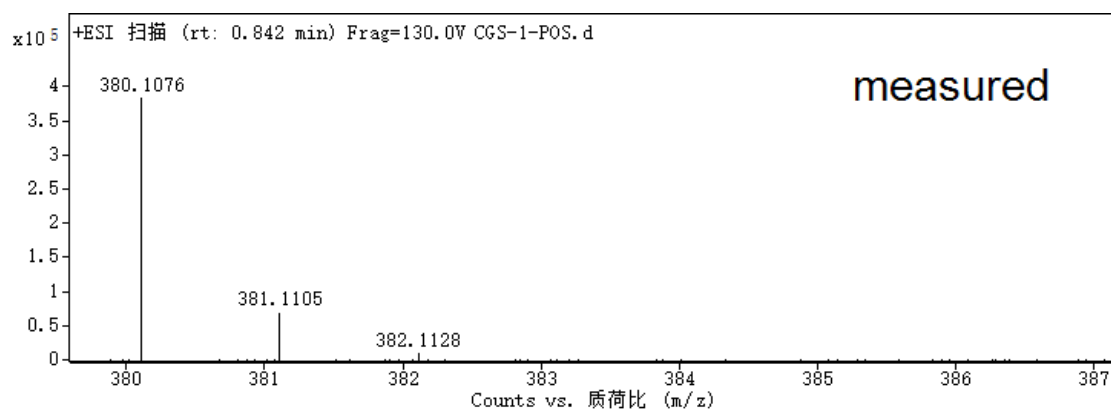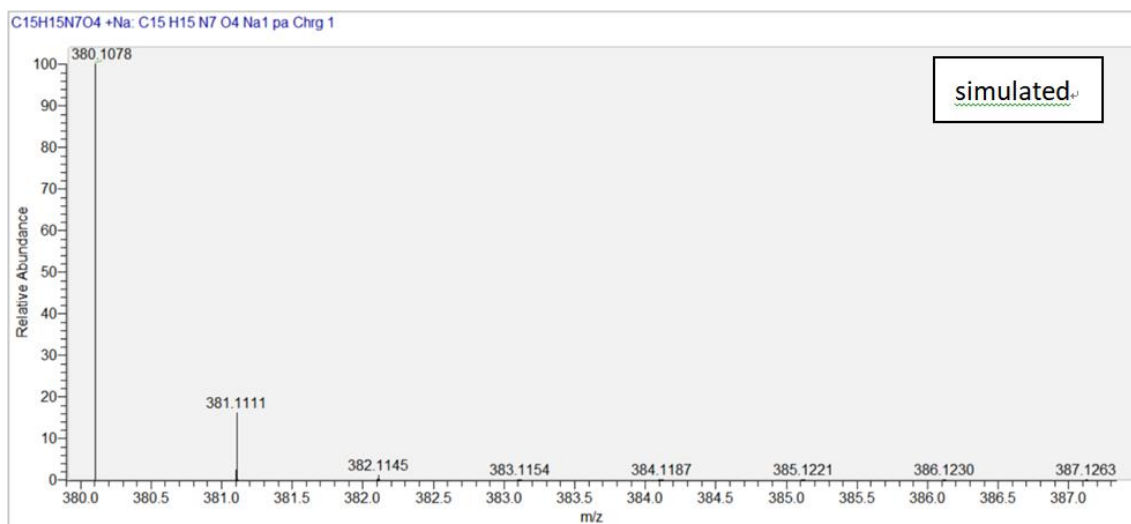

**Fig. S3** Positive-ion electrospray ionization mass spectra (ESI-MS) of dbes in CH<sub>3</sub>CN.

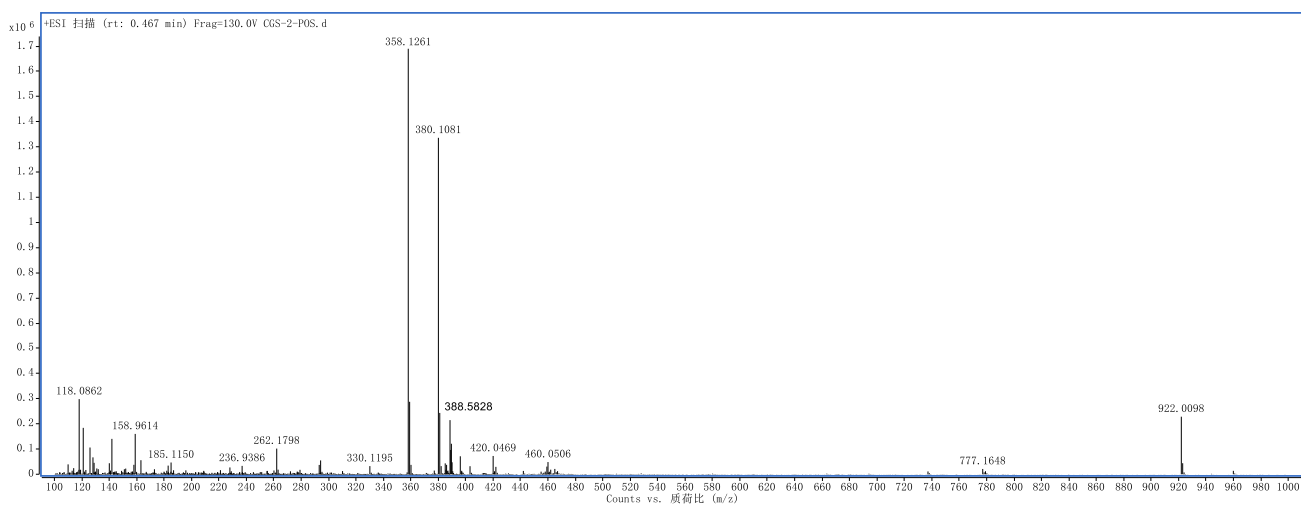



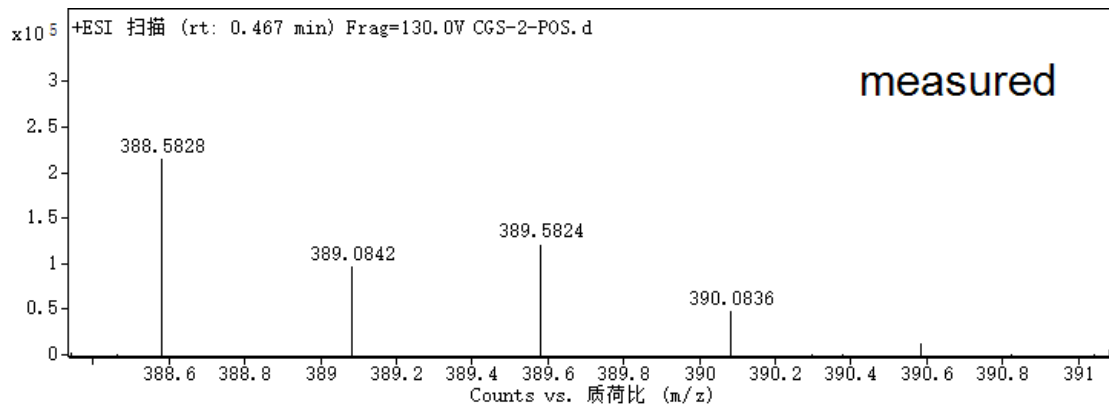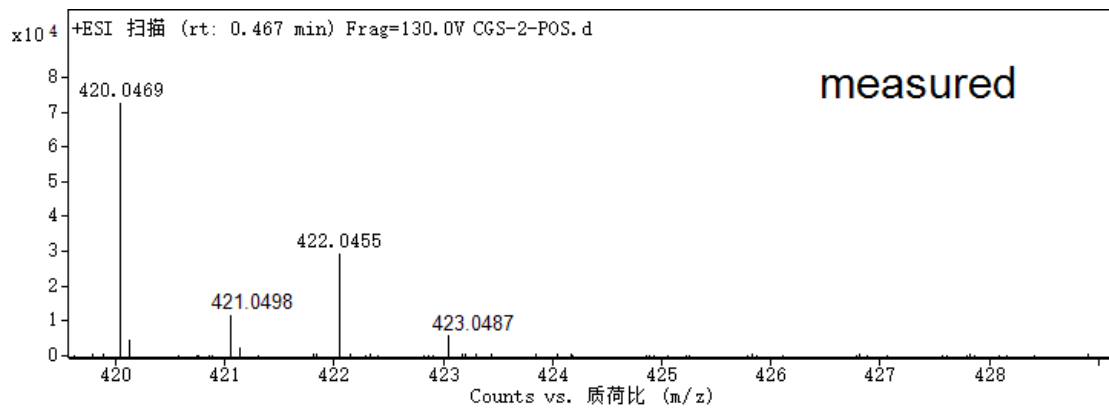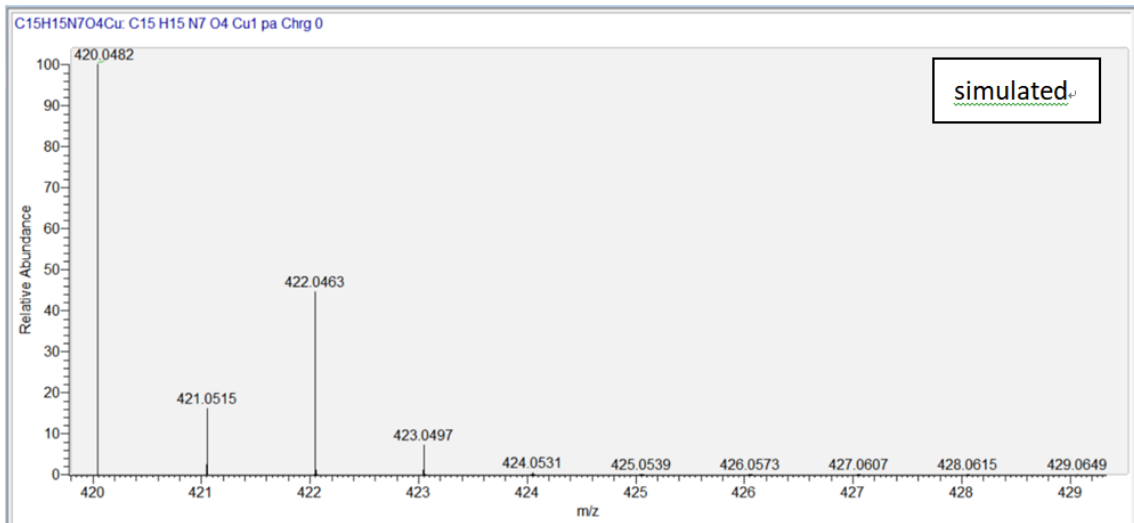

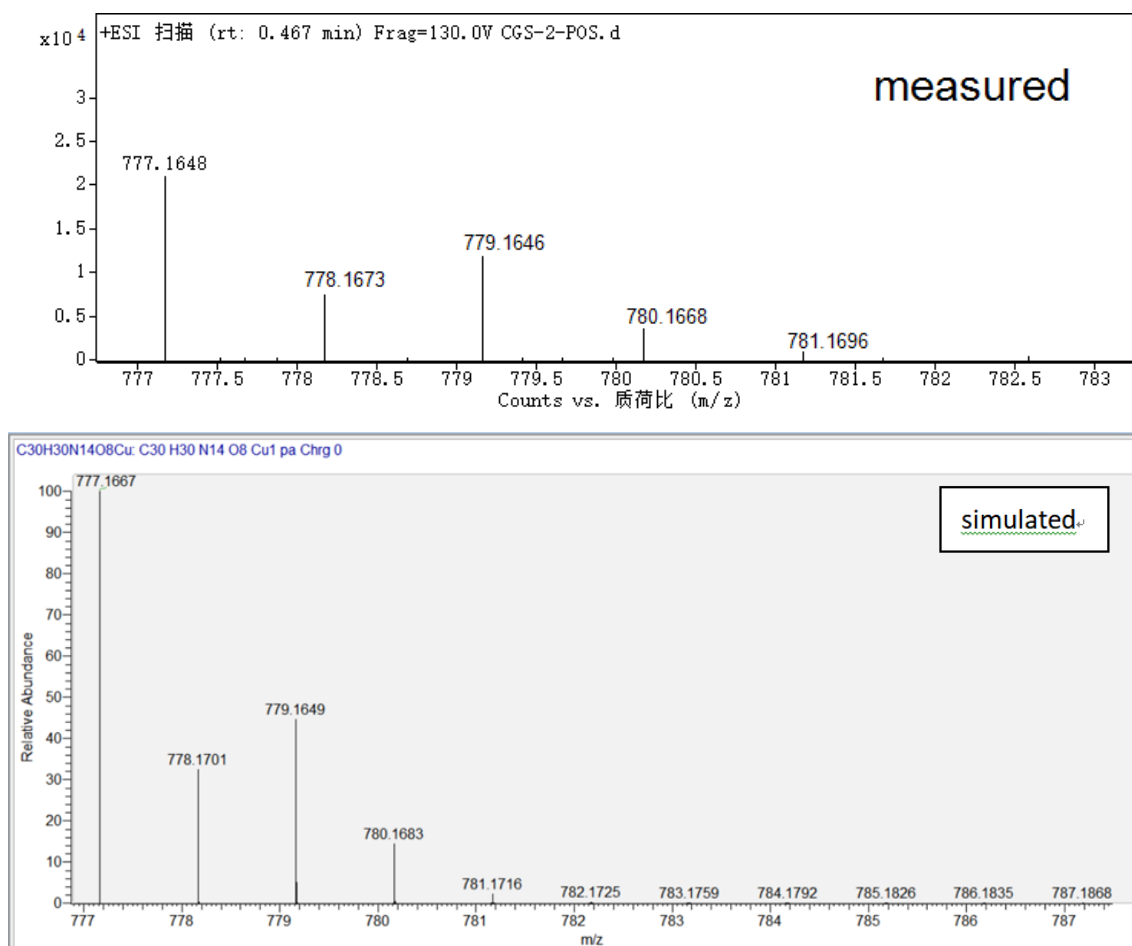

**Fig. S4** Positive-ion electrospray ionization mass spectra (ESI-MS) of Cudbes in CH<sub>3</sub>CN.

**Table S3** ESI-MS data of dbes and Cudbes.

| Fragment Species                        | Observed (calculated)             |
|-----------------------------------------|-----------------------------------|
| {dbes+H} <sup>+</sup>                   | 358.1257 (358.1258)               |
| {dbes+Na} <sup>+</sup>                  | 380.1076 (380.1078)               |
| [Cu(dbes) <sub>2</sub> ] <sup>2+</sup>  | 388.5828 (388.5896)               |
| [Cu(dbes)-H] <sup>+</sup>               | 420.0469 (420.0482)               |
| [Cu(dbes) <sub>2</sub> -H] <sup>+</sup> | 777.1648 (777.1667)               |
| {[Cu(dbes)]+TFA-H} <sup>+</sup>         | 533.0325 (533.0332) (in Fig. S33) |

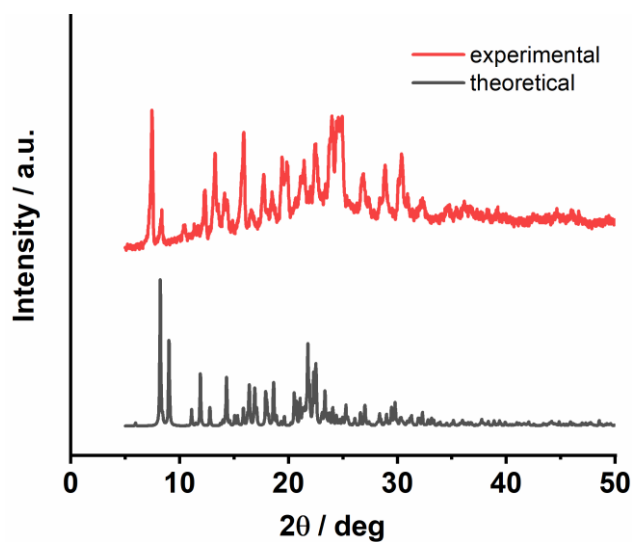

**Fig. S5** Experimental and simulated powder X-ray diffraction (PXRD) patterns for Cudbes.

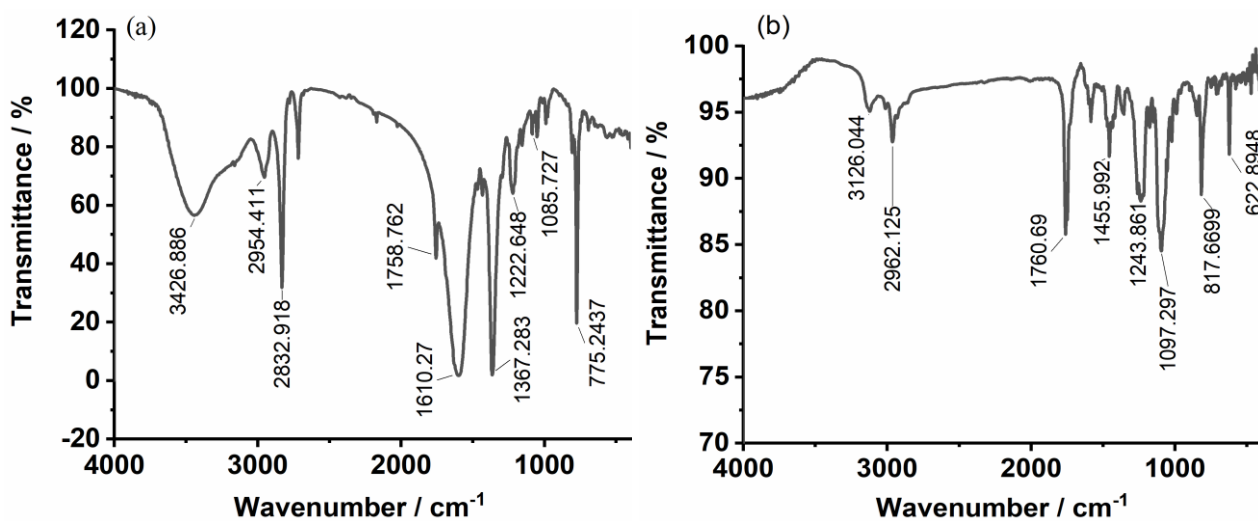

**Fig. S6** IR spectra of (a) dbes and (b) Cudbes.

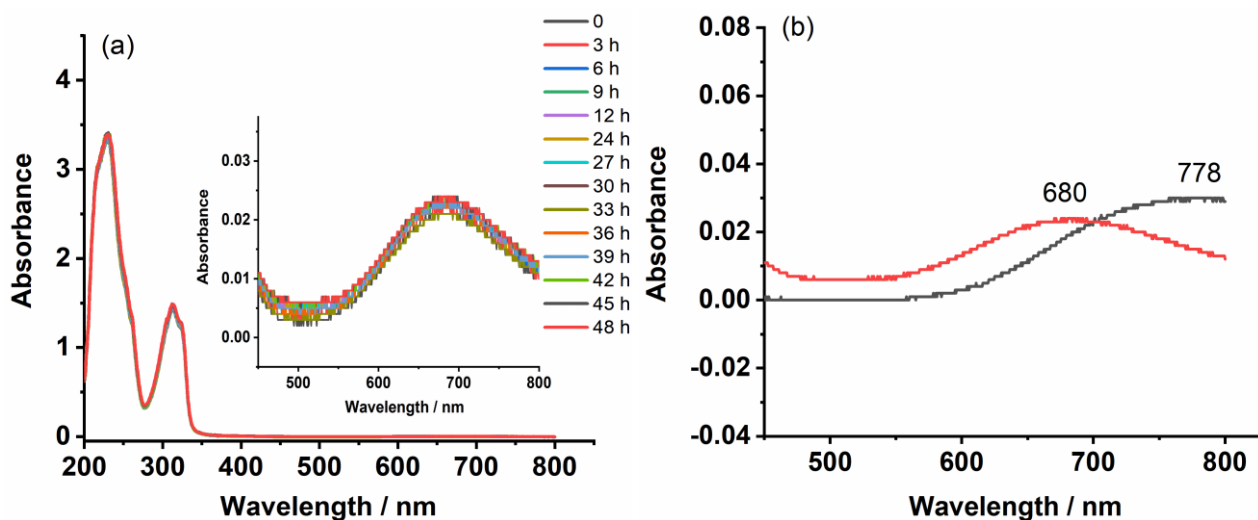

**Fig. S7** UV-vis absorption spectra of (a) Cudbes in CH<sub>3</sub>CN at different time, (b) Cu(ClO<sub>4</sub>)<sub>2</sub> (black line) and Cudbes (red line) in CH<sub>3</sub>CN after 48 h. Concentration: 0.1 mM.

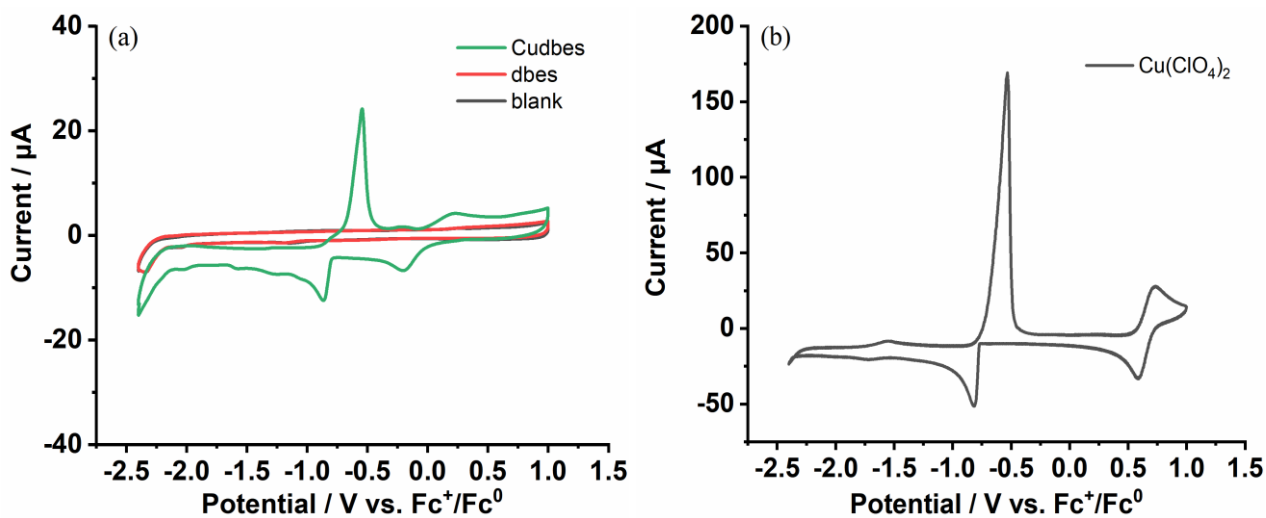

**Fig. S8** Cyclic voltammograms using glassy carbon electrode in CH<sub>3</sub>CN containing 0.1 M TBAPF<sub>6</sub> for (a) Cudbes, dbes and blank, (b) Cu(ClO<sub>4</sub>)<sub>2</sub>. Scan rate: 0.1 V s<sup>-1</sup>. Concentration: 0.5 mM.

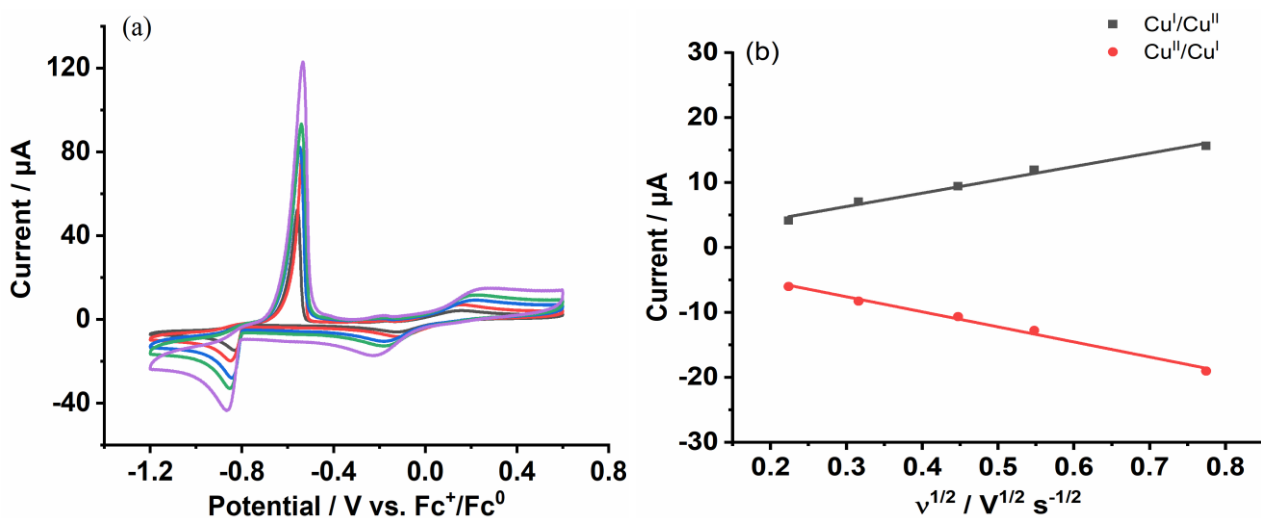

**Fig. S9** (a) Cyclic voltammograms of 0.5 mM Cudbes in  $\text{CH}_3\text{CN}$  containing 0.1 M  $\text{TBAPF}_6$  at scan rates of 0.05, 0.1, 0.2, 0.3 and 0.6  $\text{V s}^{-1}$ . (b) Plots of the peak current ( $i_p$ ) vs square root of scan rate.

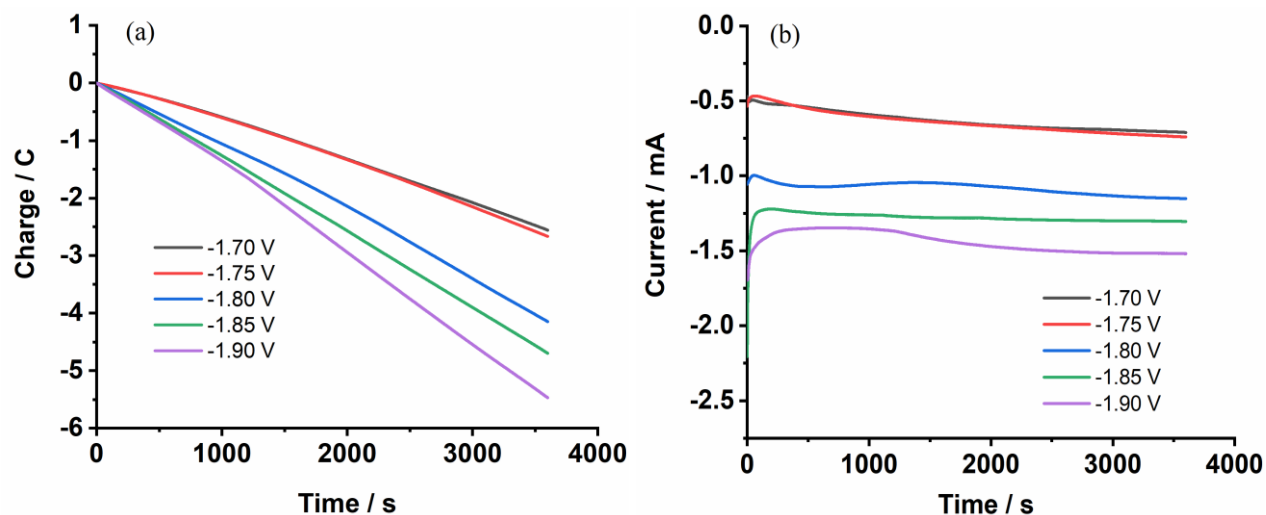

**Fig. S10** (a) Charge-time curves and (b) current-time curves of 0.5 mM Cudbes in 0.1 M  $\text{TBAPF}_6$   $\text{CH}_3\text{CN}$  solution with 200 equivalents of AcOH during the electrolysis at -1.70 V, -1.75 V, -1.80 V, -1.85 V and -1.90 V. Glassy carbon working electrode.

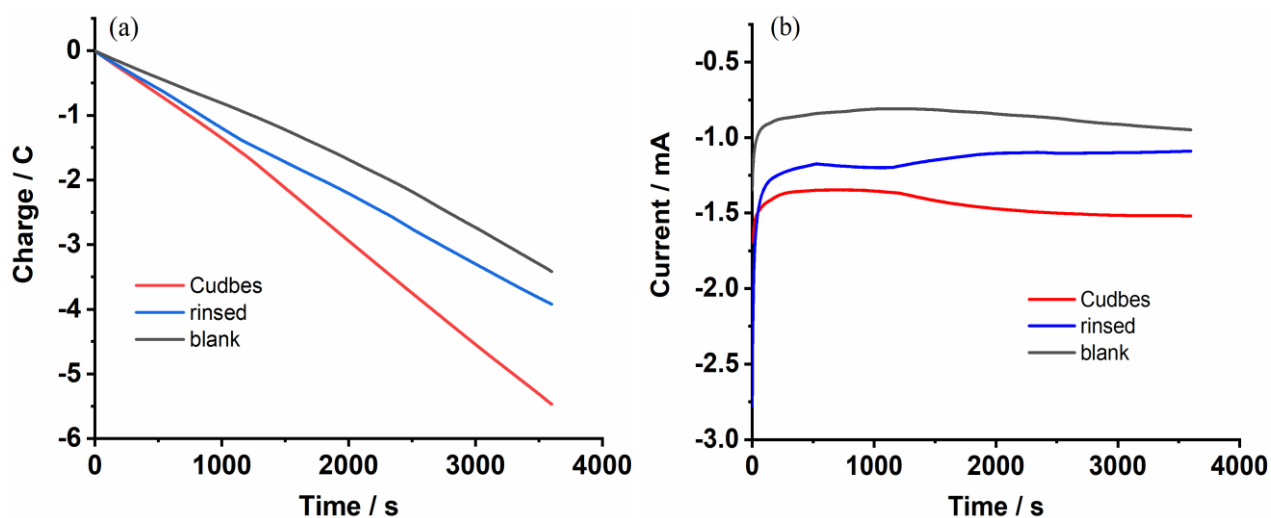

**Fig. S11** (a) Charge-time curves and (b) current-time curves of 0.5 mM Cudbes in 0.1 M TBAPF<sub>6</sub> CH<sub>3</sub>CN containing 200 equivalents of AcOH during the electrolysis at -1.90 V. Glassy carbon working electrode.

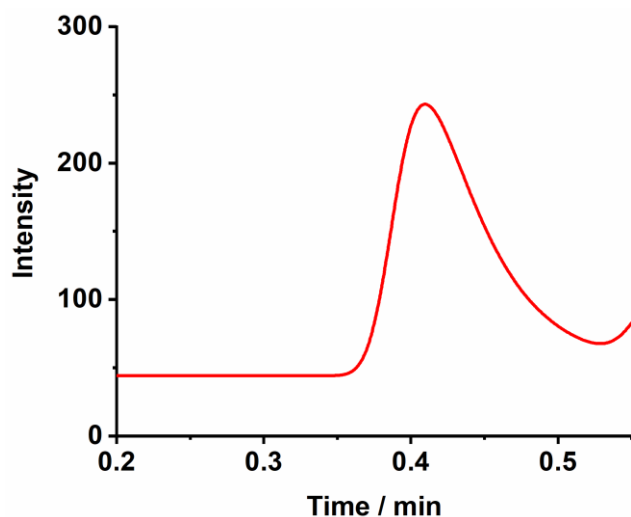

**Fig. S12** Gas chromatographic spectrum of 0.5 mM Cudbes in 0.1 M TBAPF<sub>6</sub> CH<sub>3</sub>CN containing 200 equivalents of AcOH after the electrolysis at -1.90 V for 1 h.

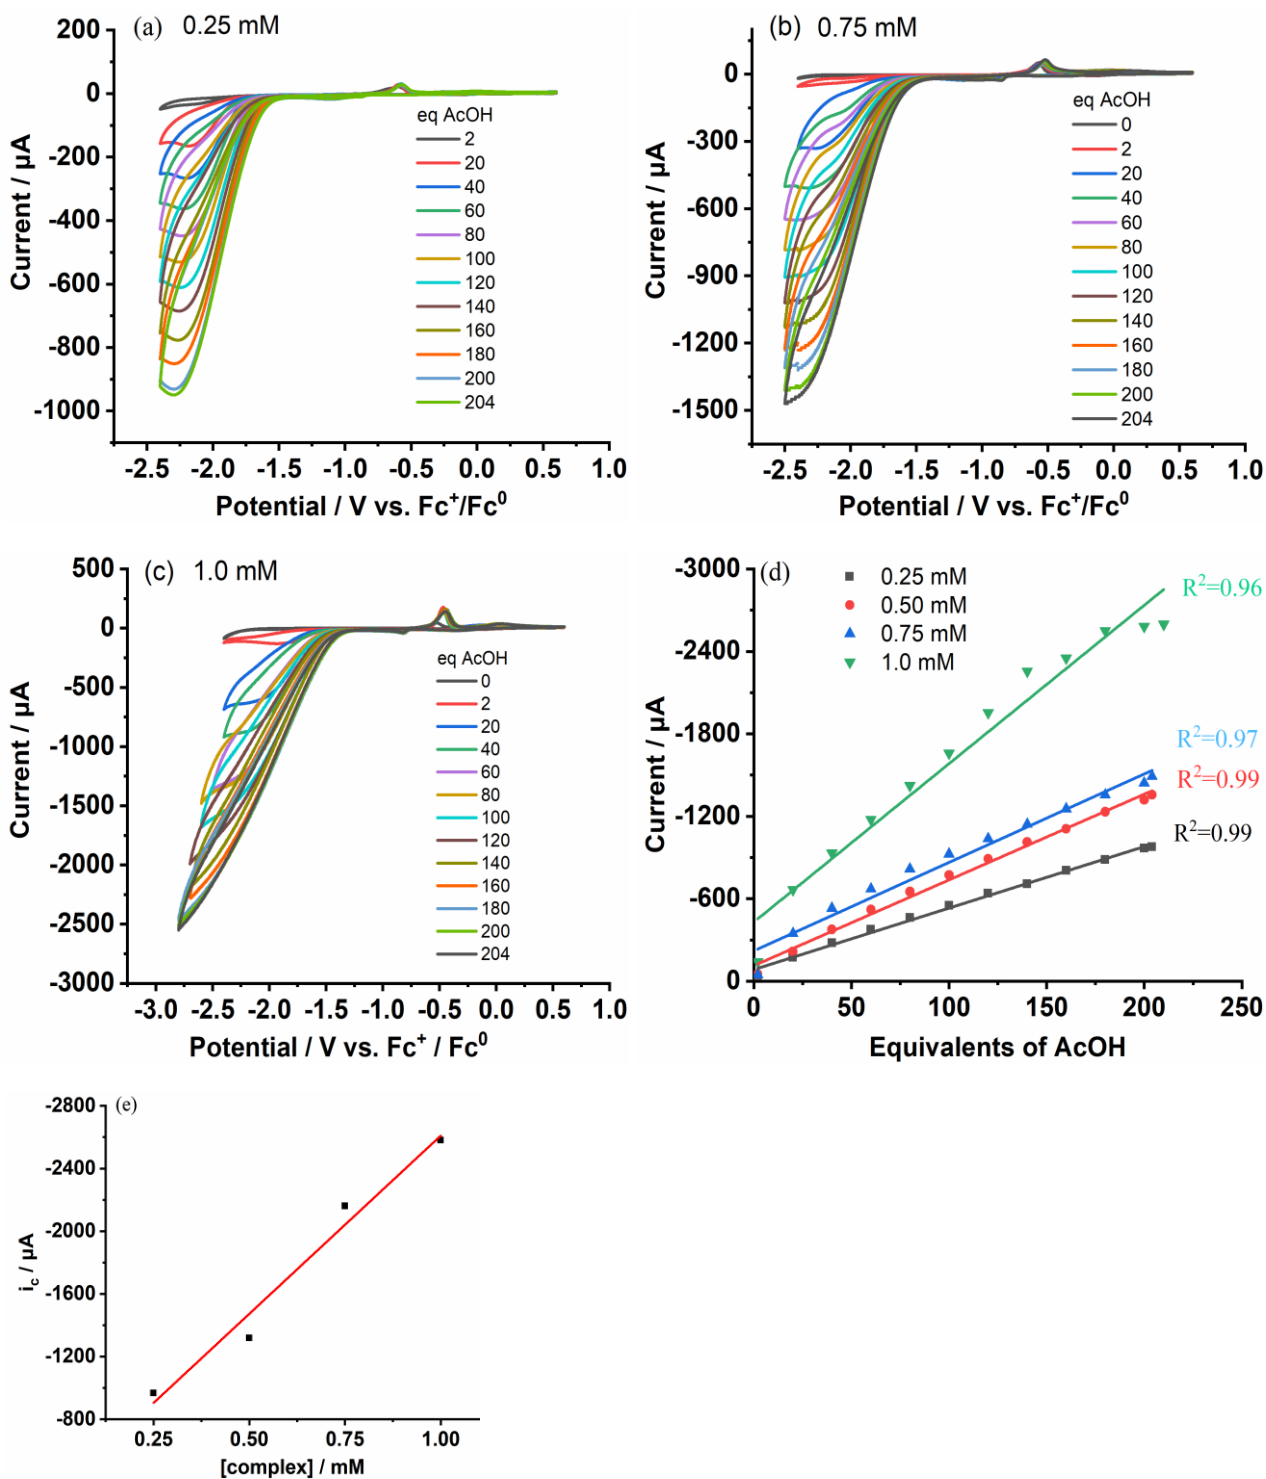

**Fig. S13** Cyclic voltammograms in 0.1 M  $\text{TBAPF}_6$   $\text{CH}_3\text{CN}$  solutions with different concentrations of AcOH for (a) 0.25 mM Cudbes, (b) 0.75 mM Cudbes, (c) 1.0 mM Cudbes. (d) Plots of the catalytic currents ( $i_c$ ) vs the concentration of AcOH. (e) Plots of the catalytic current ( $i_c$ ) vs the concentration of Cudbes in the presence of 200 equivalents of AcOH. Glassy carbon working electrode, scan rate:  $0.1 \text{ V s}^{-1}$ .

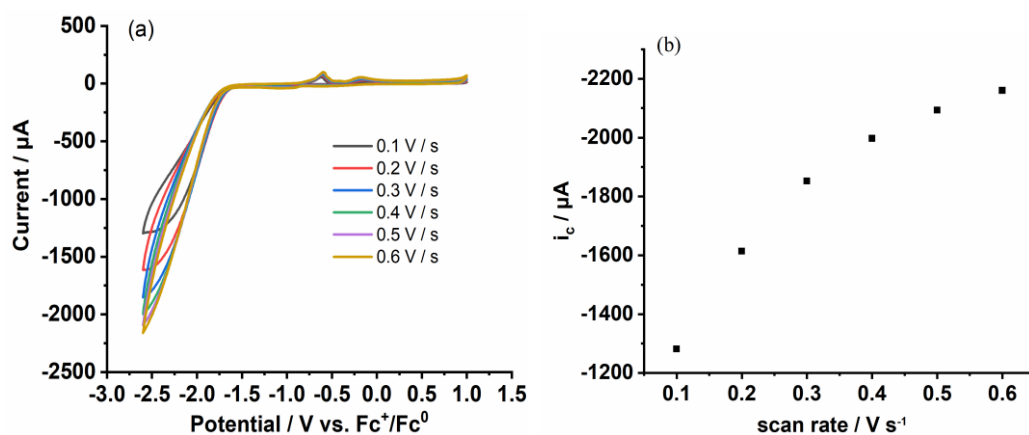

**Fig. S14** (a) Cyclic voltammograms of 0.5 mM Cudbes in 0.1 M  $\text{TBAPF}_6 \text{CH}_3\text{CN}$  solution containing 200 equivalents of AcOH at scan rates of 0.1, 0.2, 0.3, 0.4, 0.5, and 0.6  $\text{V s}^{-1}$ . (b) Plot of catalytic current ( $i_c$ ) vs square root of scan rate. Glassy carbon working electrode.

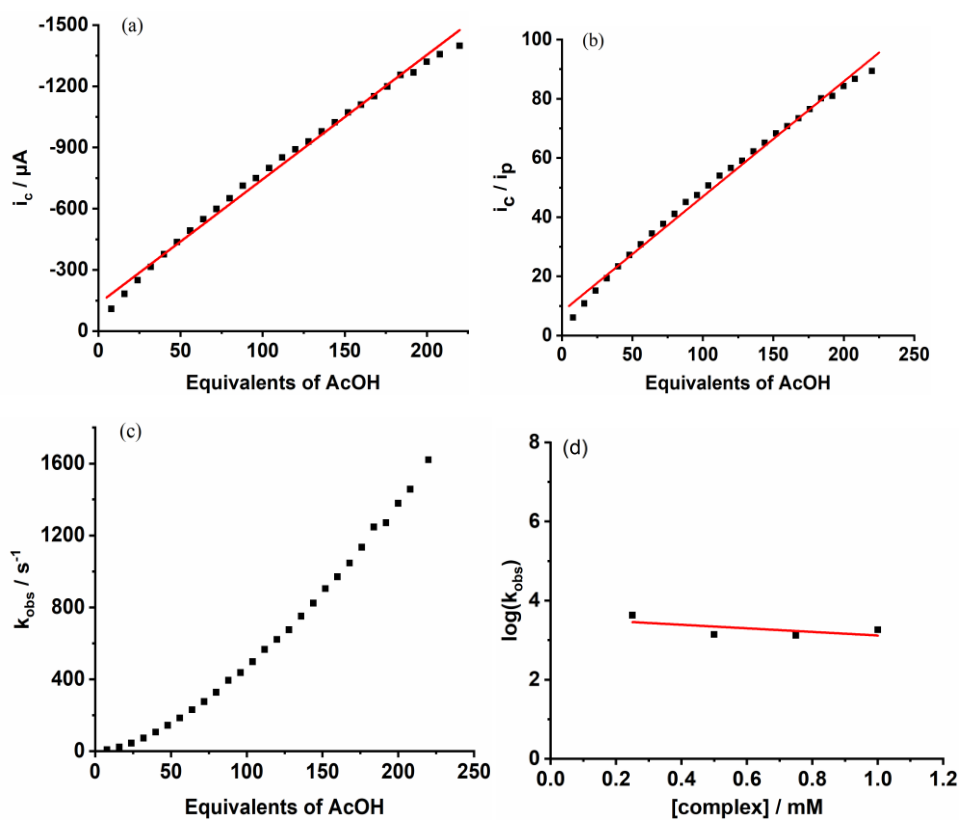

**Fig. S15** (a) Plot of catalytic current ( $i_c$ ) vs the concentration of AcOH. (b) Plot of  $i_c/i_p$  vs the concentration of AcOH. (c) Plot of  $k_{\text{obs}}$  vs the concentration of AcOH. Conditions: 0.5 mM Cudbes in 0.1 M  $\text{TBAPF}_6 \text{CH}_3\text{CN}$  solution, glassy carbon working electrode, scan rate: 0.1  $\text{V s}^{-1}$ . (d) Plot of  $k_{\text{obs}}$  vs the concentration of Cudbes in the presence of 200 equivalents of AcOH. Concentration of Cudbes: 0.25 mM, 0.5 mM, 0.75 mM and 1.0 mM.



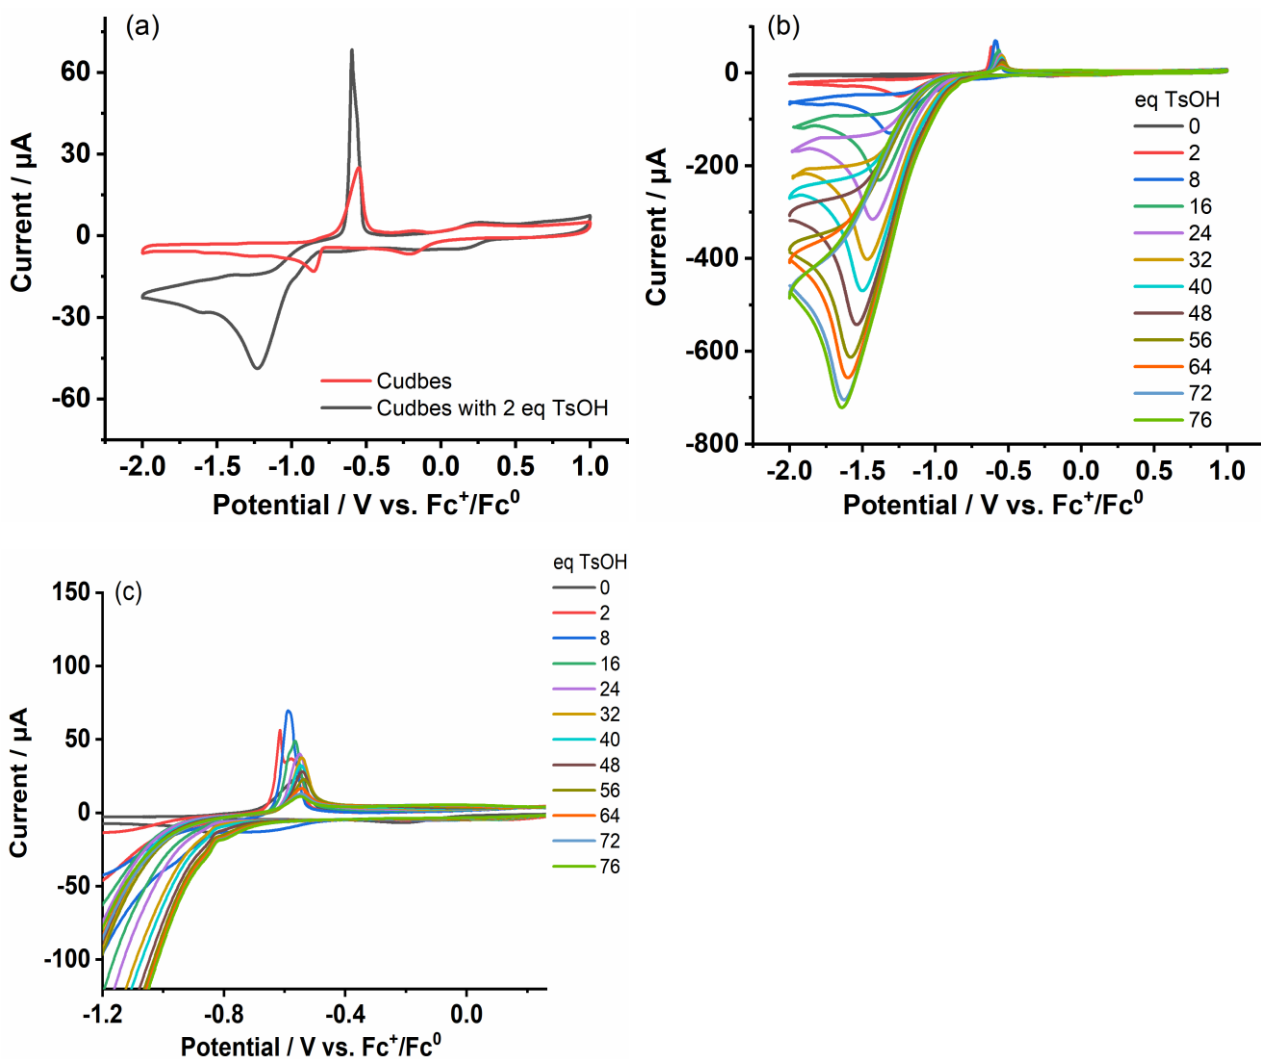

**Fig. S16** Cyclic voltammograms of 0.5 mM Cudbes in 0.1 M TBAPF<sub>6</sub> CH<sub>3</sub>CN solution: (a) with 2 equivalents of TsOH (black line) and without TsOH (red line), (b) with different concentrations of TsOH (0-76 equivalents), (c) Enlargement of Fig. (b). Glassy carbon working electrode, scan rate: 0.1 V s<sup>-1</sup>.

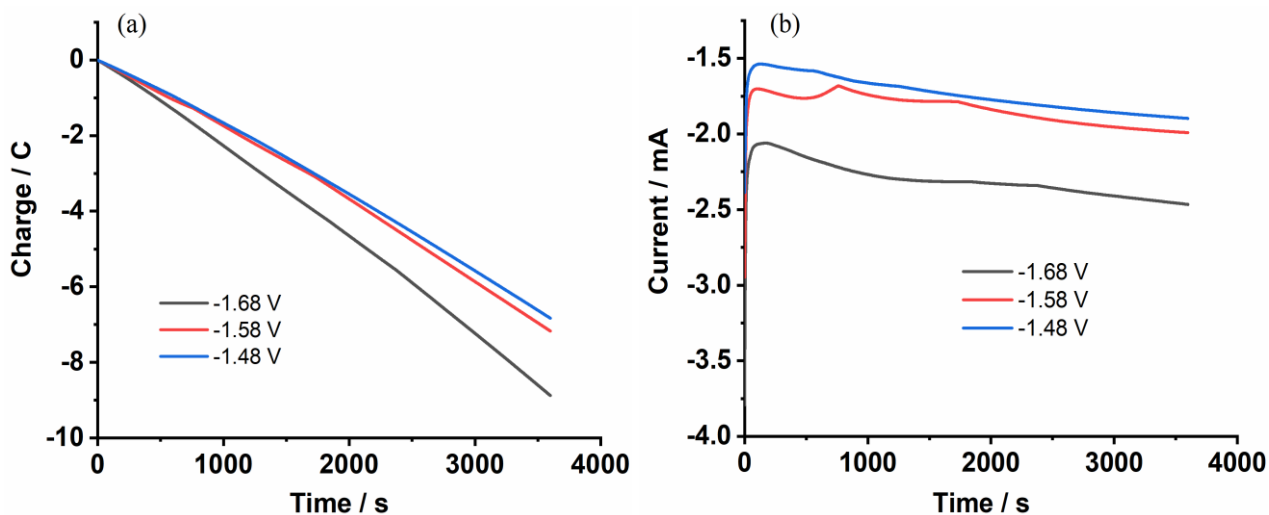

**Fig. S17** (a) Charge-time curves and (b) current-time curves during the electrolysis of 0.5 mM Cudbes in 0.1 M TBAPF<sub>6</sub> CH<sub>3</sub>CN solution in the presence of 88 equivalents of TFA at the potentials of -1.48 V, -1.58 V and -1.68 V. Glassy carbon working electrode.

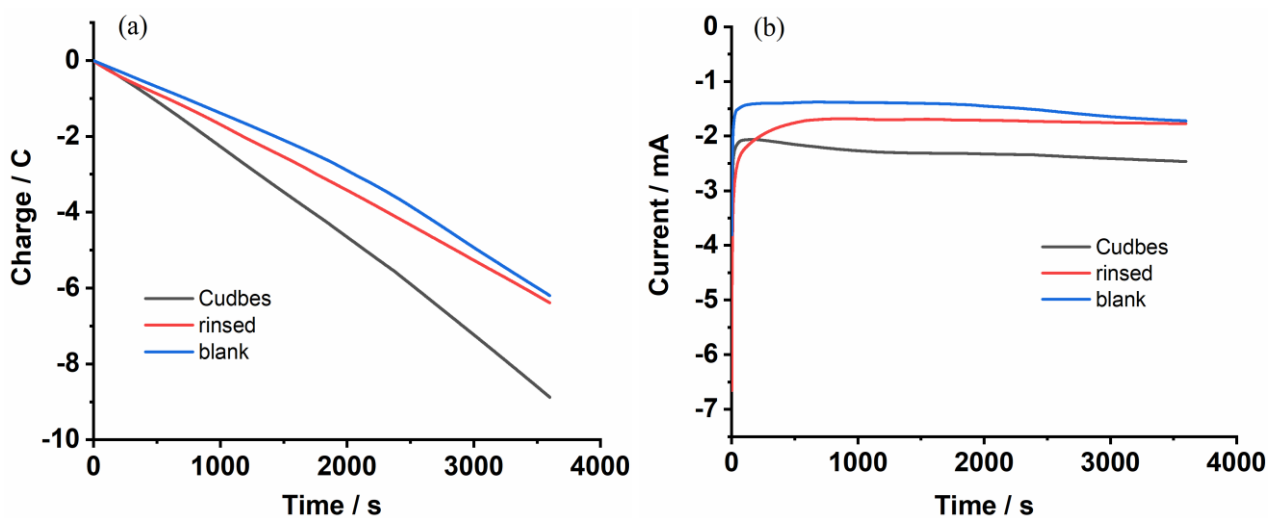

**Fig. S18** (a) Charge-time curve and (b) current-time curve during the electrolysis of 0.5 mM Cudbes in 0.1 M TBAPF<sub>6</sub> CH<sub>3</sub>CN solution in the presence of 88 equivalents of TFA at -1.68 V. Glassy carbon working electrode.

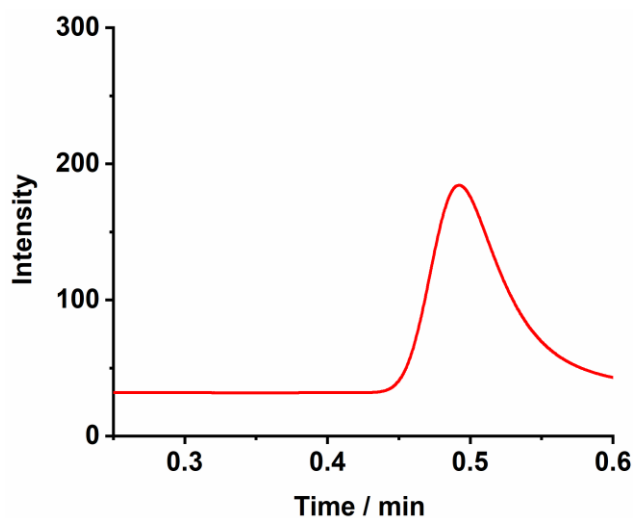

**Fig. S19** Gas chromatographic spectrum of 0.5 mM Cudbes in 0.1 M TBAPF<sub>6</sub> CH<sub>3</sub>CN containing 88 equivalents of TFA after the electrolysis at -1.68 V for 1 h.

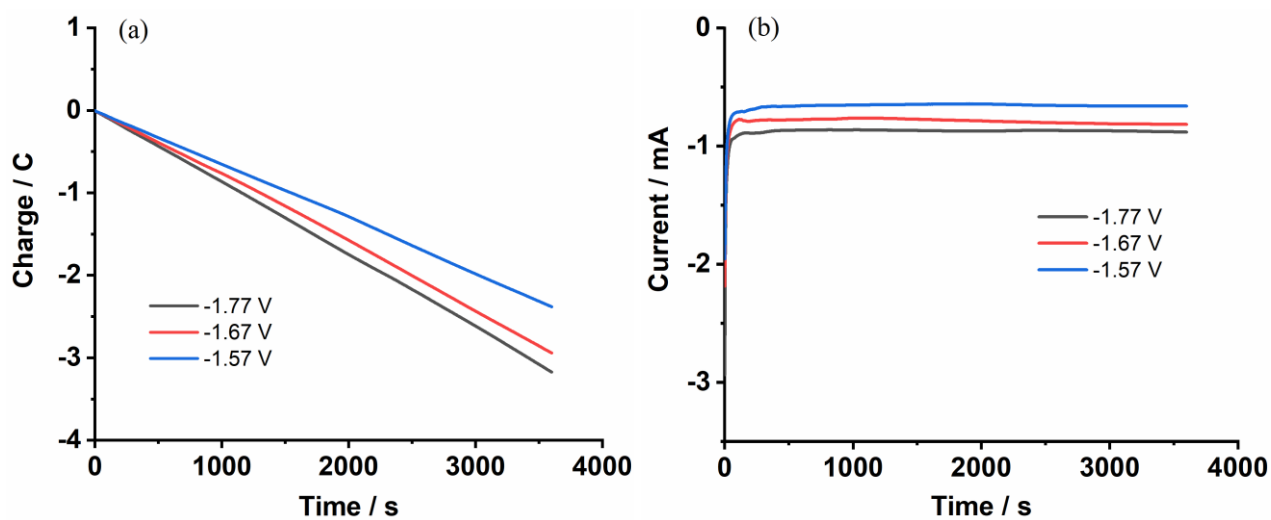

**Fig. S20** (a) Charge-time curves and (b) current-time curves during the electrolysis of 0.5 mM Cudbes in 0.1 M TBAPF<sub>6</sub> CH<sub>3</sub>CN solution in the presence of 72 equivalents of TsOH at the potentials of -1.57 V, -1.67 V and -1.77 V. Glassy carbon working electrode.

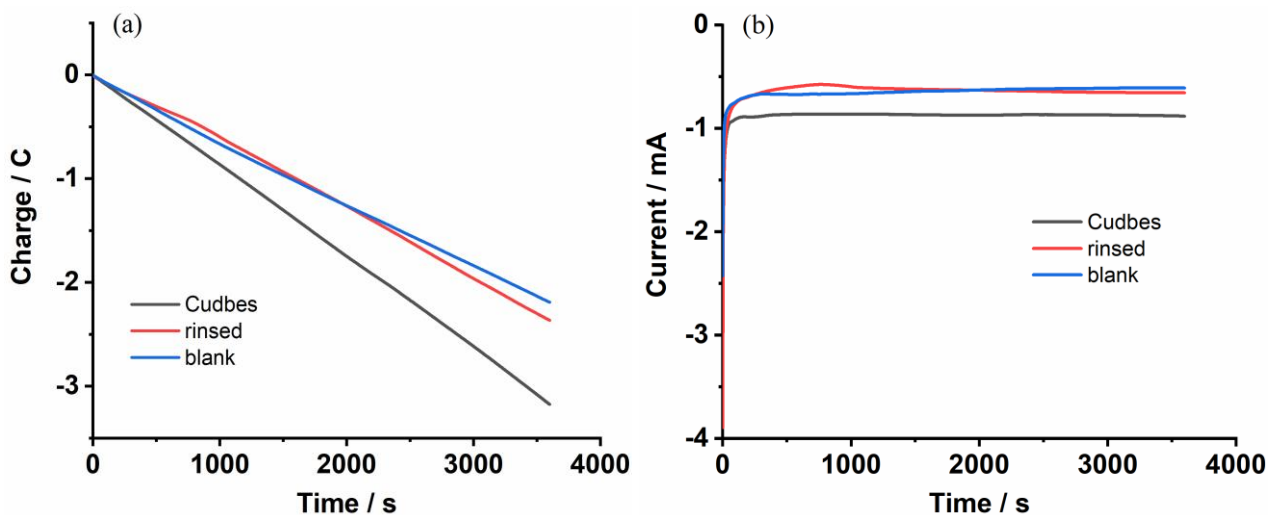

**Fig. S21** (a) Charge-time curves and (b) current-time curves of the electrolysis of 0.5 mM Cudbes in 0.1 M TBAPF<sub>6</sub> CH<sub>3</sub>CN solution in the presence of 72 equivalents of TsOH at the potential -1.77 V. Glassy carbon working electrode.

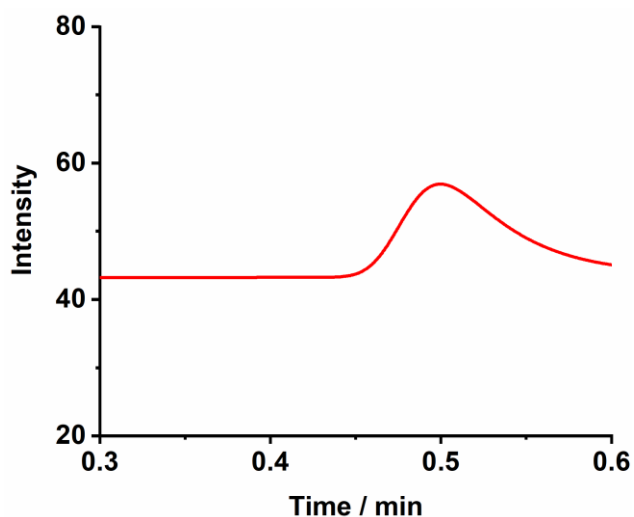

**Fig. S22** Gas chromatographic spectrum of 0.5 mM Cudbes in 0.1 M TBAPF<sub>6</sub> CH<sub>3</sub>CN containing 72 equivalents of TsOH after the electrolysis at -1.77 V for 1 h.

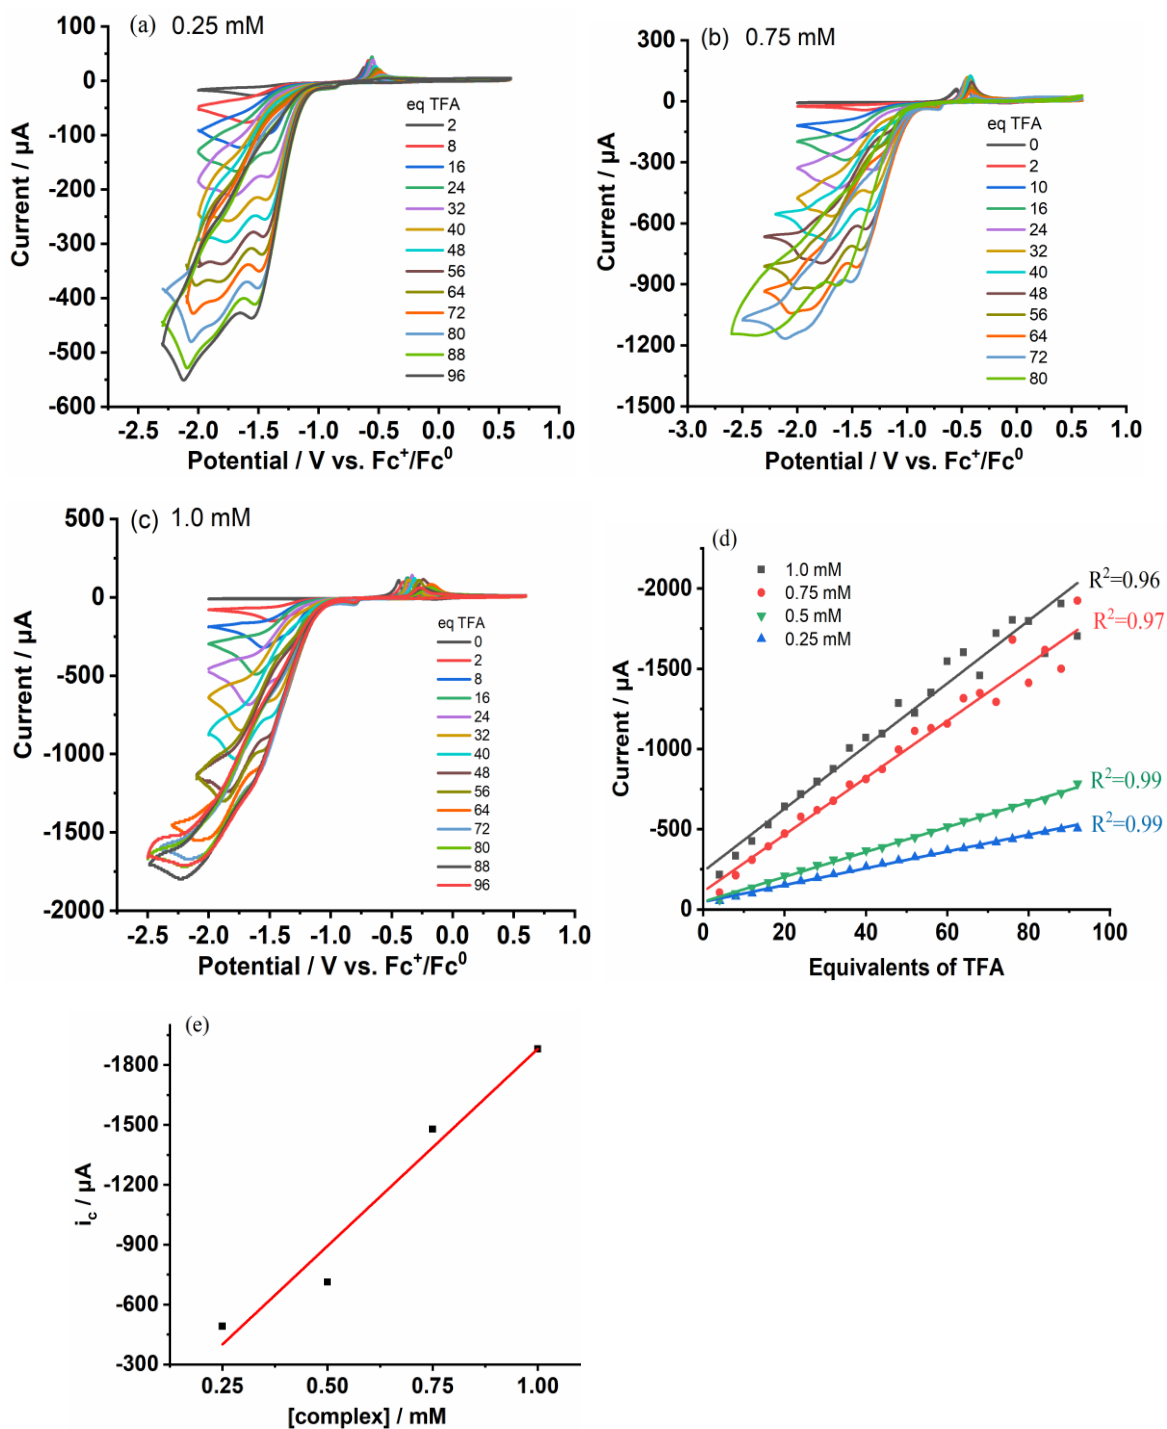

**Fig. S23** Cyclic voltammograms in 0.1 M TBAPF<sub>6</sub> CH<sub>3</sub>CN solutions in the presence of different concentrations of TFA for (a) 0.25 mM Cudbes, (b) 0.75 mM Cudbes, (c) 1.0 mM Cudbes. (d) Plots of the catalytic currents ( $i_c$ ) vs the TFA concentration. (e) Plots of the catalytic current ( $i_c$ ) vs the concentration of Cudbes in the presence of 88 equivalents of TFA. Glassy carbon working electrode, scan rate: 0.1 V s<sup>-1</sup>.

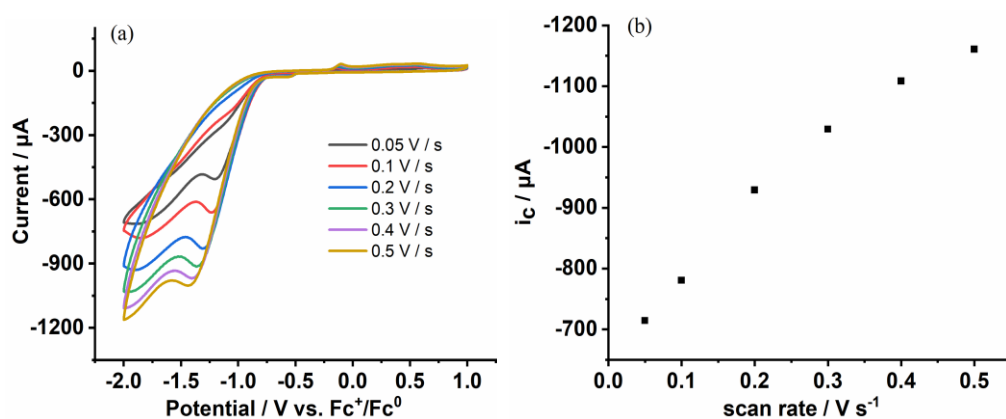

**Fig. S24** (a) Cyclic voltammograms of 0.5 mM Cudbes in 0.1 M TBAPF<sub>6</sub> CH<sub>3</sub>CN solution in the presence of 88 equivalents of TFA at scan rates of 0.05, 0.1, 0.2, 0.3, 0.4, and 0.5 V s<sup>-1</sup>. (b) Plot of catalytic current ( $i_c$ ) vs square root of scan rate. Glassy carbon working electrode.

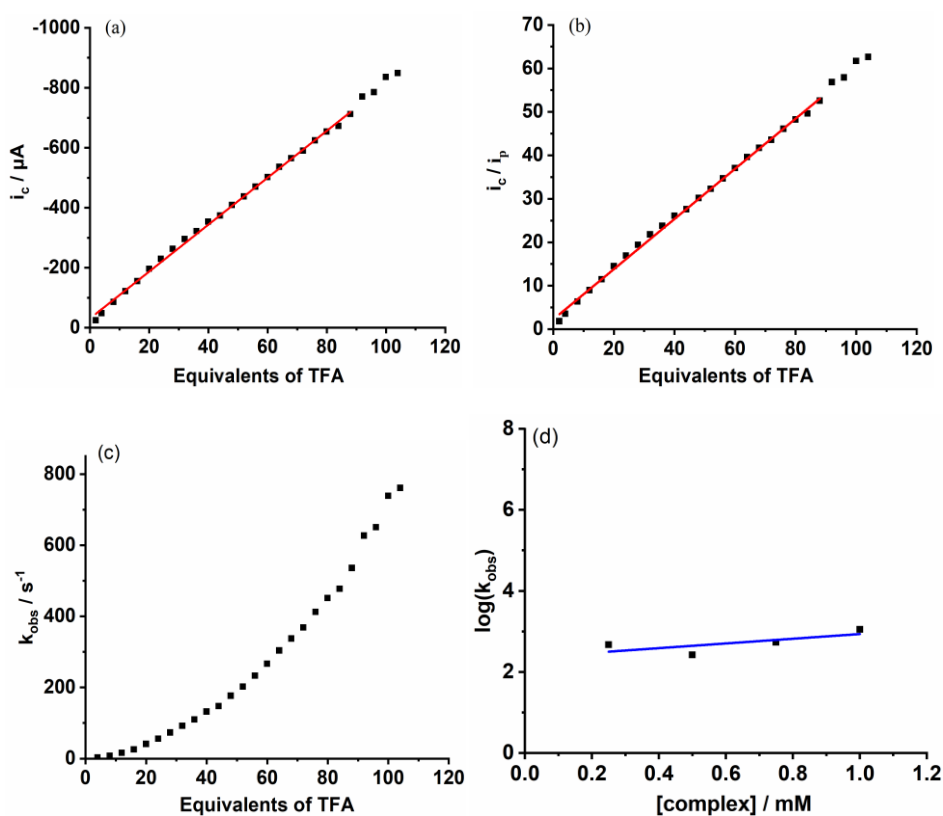

**Fig. S25** (a) Plot of catalytic current ( $i_c$ ) vs the concentration of TFA. (b) Plot of  $i_c/i_p$  vs the concentration of TFA. (c) Plot of  $k_{obs}$  vs the concentration of TFA. Conditions: 0.5 mM Cudbes in 0.1 M TBAPF<sub>6</sub> CH<sub>3</sub>CN solution, glassy carbon working electrode, scan rate: 0.1 V s<sup>-1</sup>. (d) Plot of  $k_{obs}$  vs the concentration of Cudbes in the presence of 88 equivalents of TFA. Concentration of Cudbes: 0.25 mM, 0.5 mM, 0.75 mM and 1.0 mM.

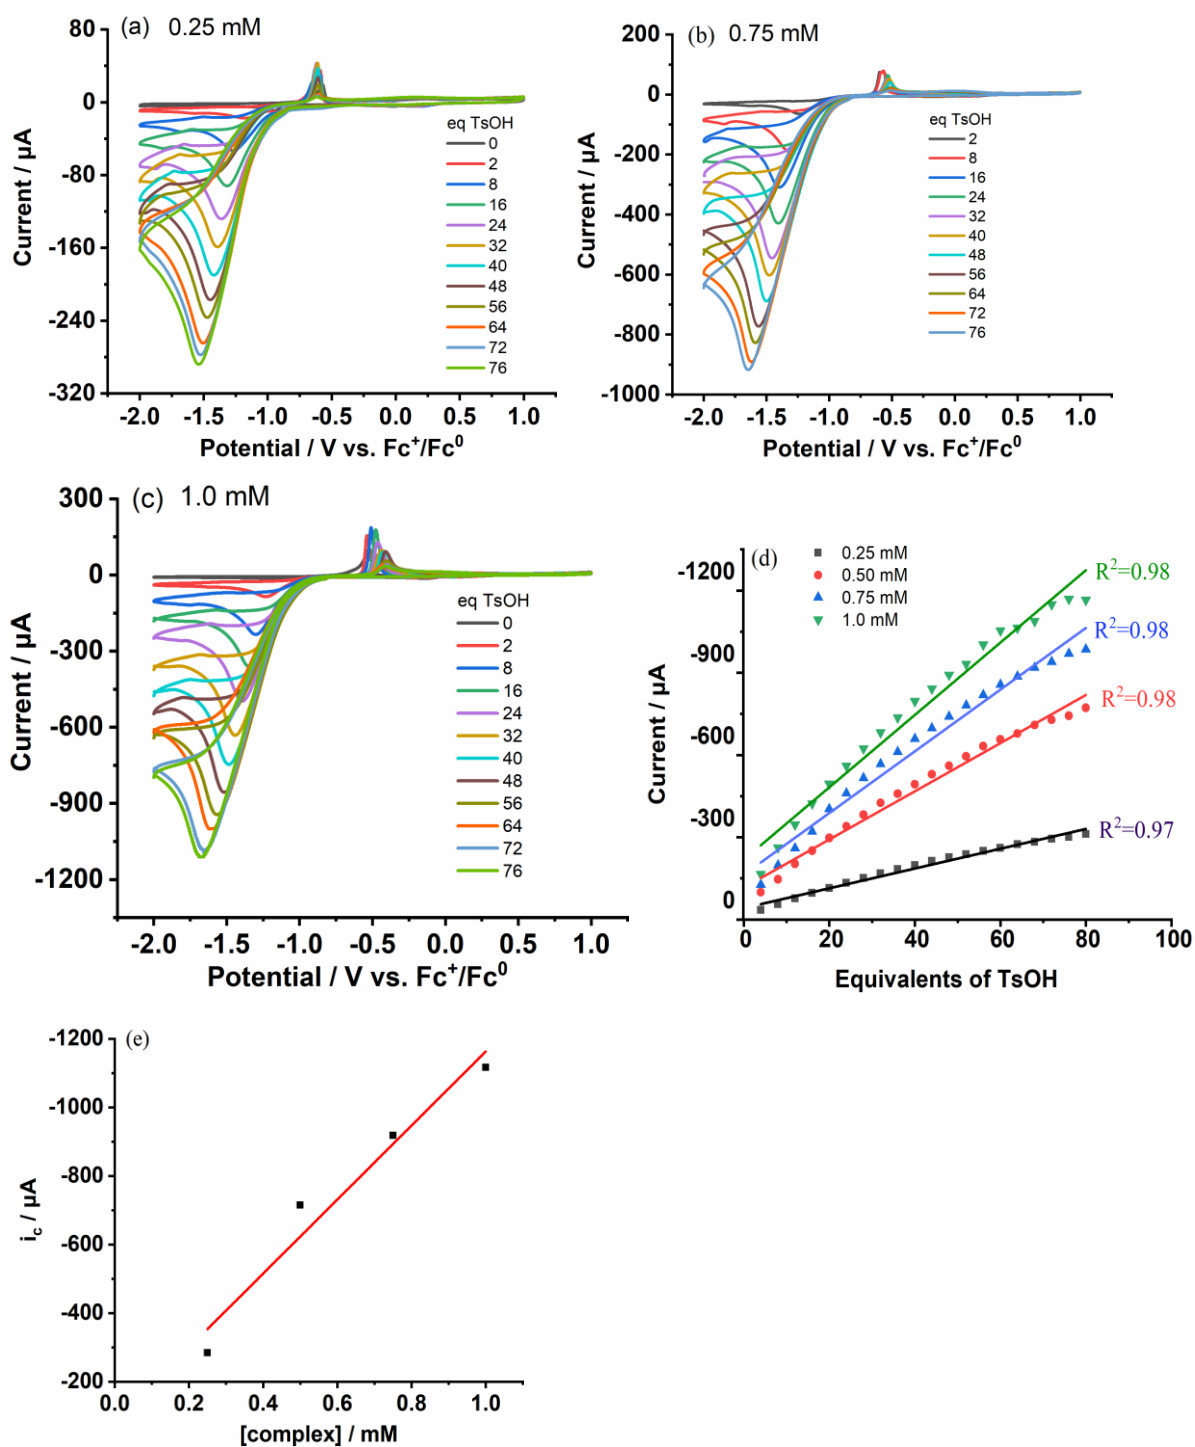

**Fig. S26** Cyclic voltammograms in 0.1 M  $\text{TBAPF}_6$   $\text{CH}_3\text{CN}$  solutions in the presence of different concentrations of TsOH for (a) 0.25 mM Cudbes , (b) 0.75 mM Cudbes , (c) 1.0 mM Cudbes . (d) Plots of the catalytic currents ( $i_c$ ) vs the concentration of TsOH. (e) Plots of the catalytic current ( $i_c$ ) vs the concentration of Cudbes in the presence of 72 equivalents of TsOH. Glassy carbon working electrode, scan rate:  $0.1 \text{ V s}^{-1}$ .

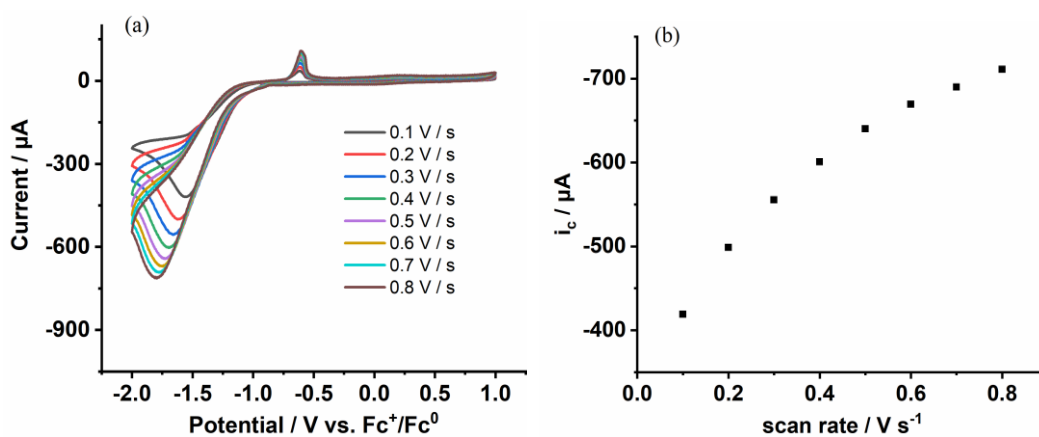

**Fig. S27** (a) Cyclic voltammograms of 0.5 mM Cudbes in 0.1 M TBAPF<sub>6</sub> CH<sub>3</sub>CN solution in the presence of 72 equivalents of TsOH at scan rates of 0.1, 0.2, 0.3, 0.4, 0.5, 0.6, 0.7 and 0.8 V s<sup>-1</sup>. (b) Plot of catalytic current ( $i_c$ ) vs square root of scan rate. Glassy carbon working electrode.

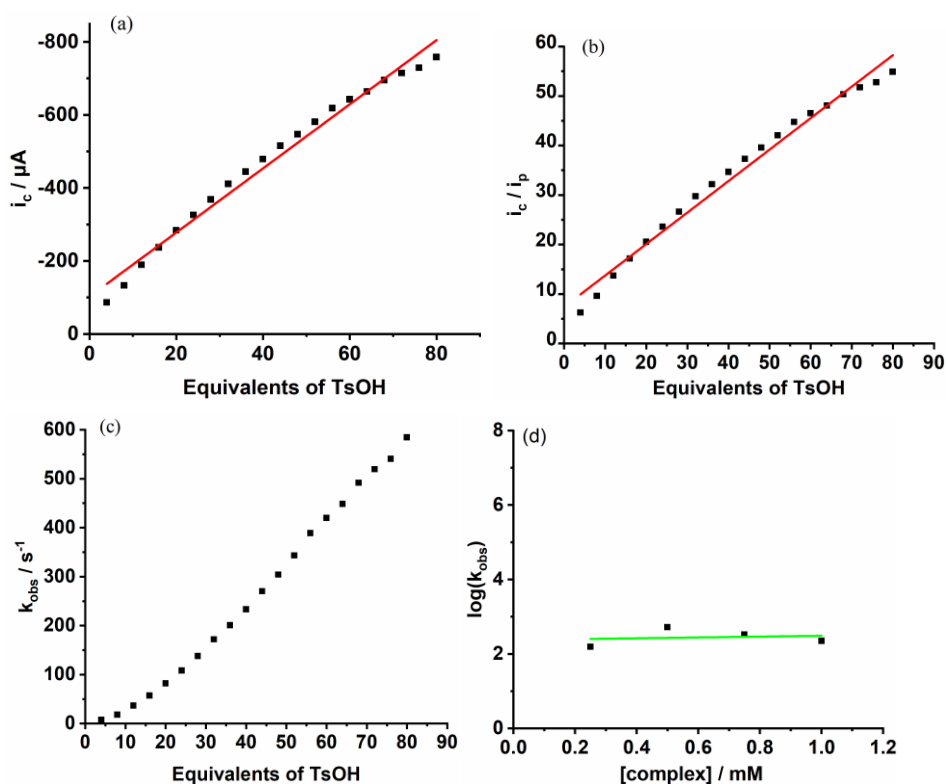

**Fig. S28** (a) Plot of catalytic current ( $i_c$ ) vs the concentration of TsOH. (b) Plot of  $i_c/i_p$  vs the concentration of TsOH. (c) Plot of  $k_{obs}$  vs the concentration of TsOH. Conditions: 0.5 mM Cudbes in 0.1 M TBAPF<sub>6</sub> CH<sub>3</sub>CN solution, glassy carbon working electrode, scan rate: 0.1 V s<sup>-1</sup>. (d) Plot of  $k_{obs}$  vs the concentration of Cudbes in the presence of 72 equivalents of TsOH. Concentration of Cudbes: 0.25 mM, 0.50 mM, 0.75 mM and 1.0 mM.



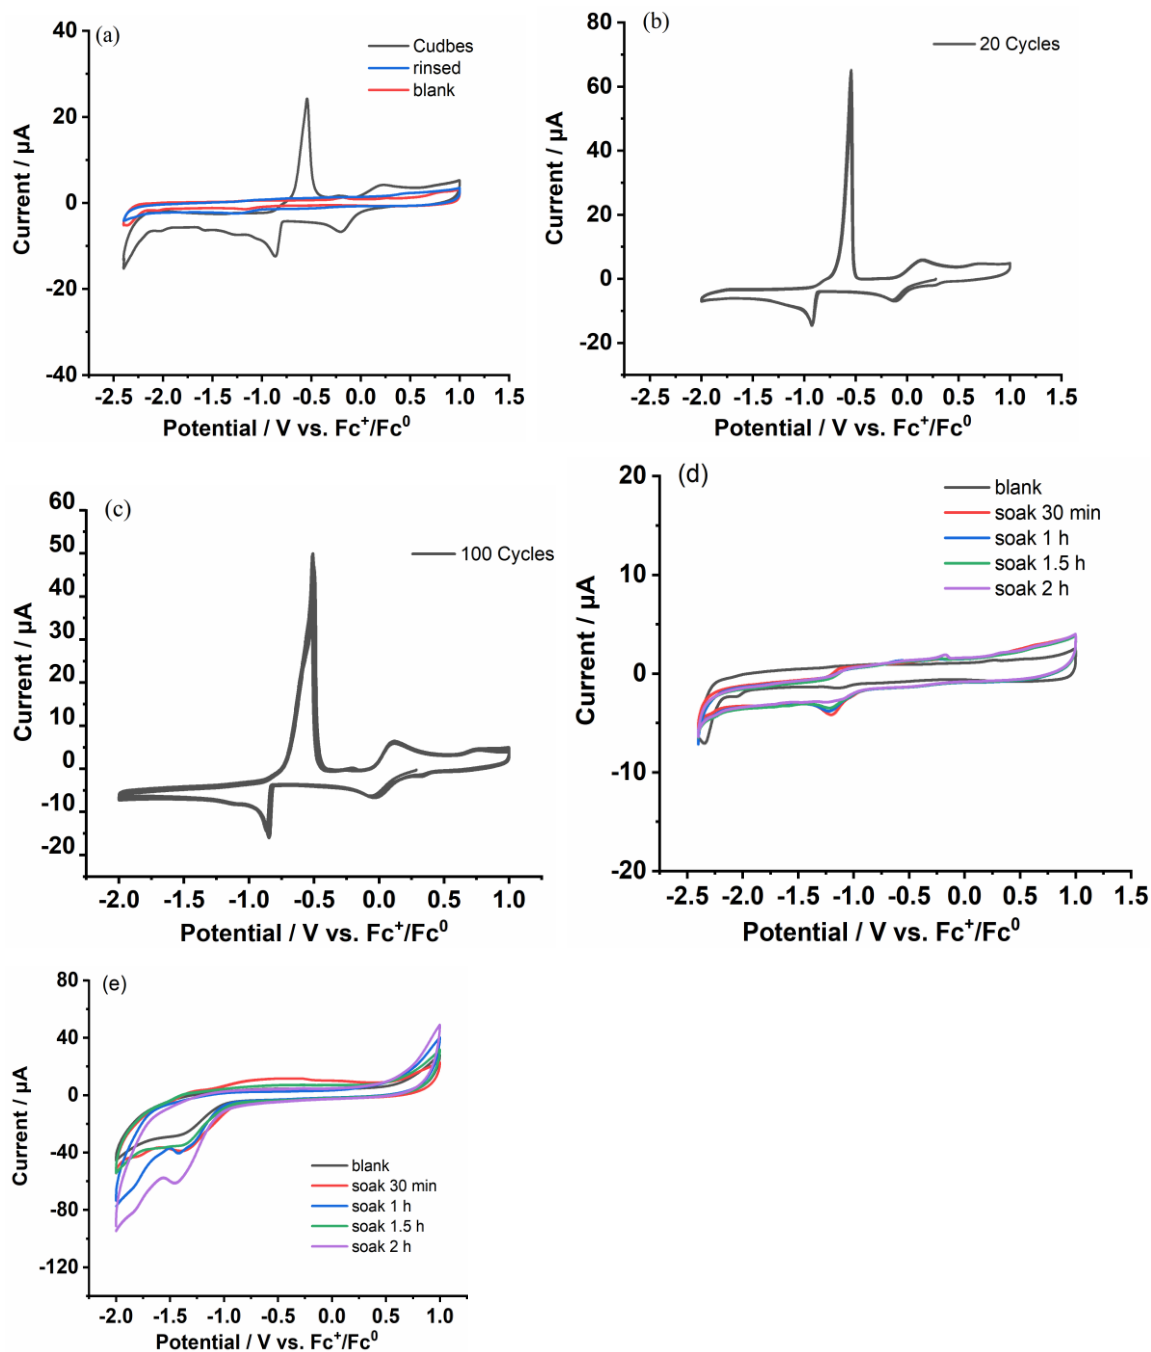

**Fig. S29** Cyclic voltammograms using glassy carbon electrode in 0.1 M  $\text{TBAPF}_6$   $\text{CH}_3\text{CN}$  solution for (a) Cudbes, rinsed electrode and blank, (b) 20 consecutive cycles and (c) 100 consecutive cycles for Cudbes, (d) a glassy carbon electrode and (e) ITO electrodes obtained from the immersion into the solution of Cudbes for different times was using as working electrode in blank solution. Scan rate:  $0.1 \text{ V s}^{-1}$ . Concentration: 0.5 mM.

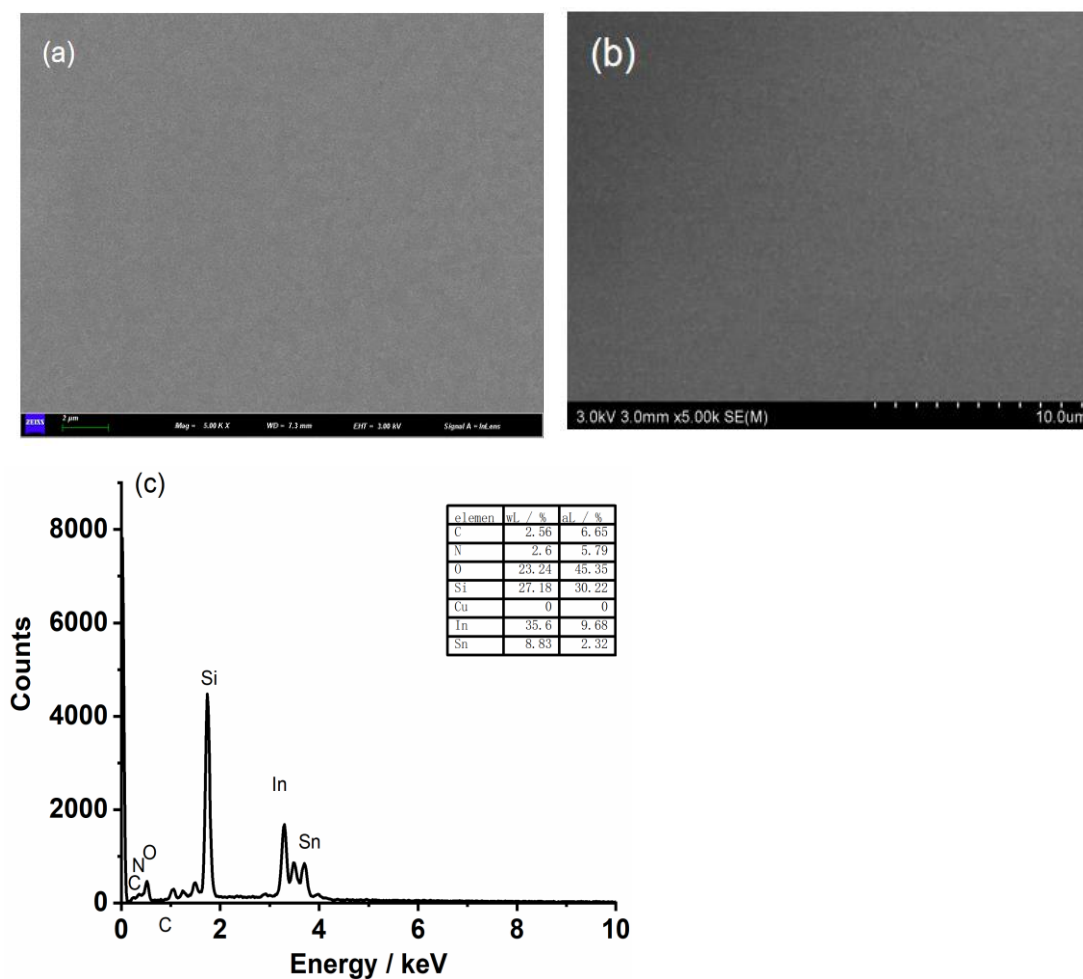

**Fig. S30** (a) SEM image of a fresh ITO electrode. (b) SEM image and (c) EDS spectrum and data of an ITO electrode obtained from the immersion in a 0.5 mM Cudbes solution for 2 h.

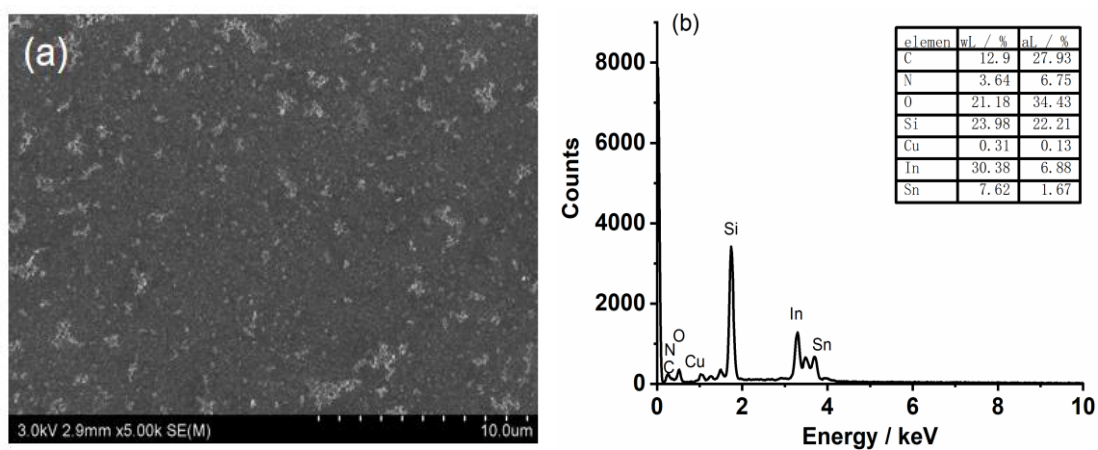

**Fig. S31** (a) SEM image and (b) EDS spectrum and data of the ITO electrode obtained from consecutive 20 cycles in 0.5 mM Cudbes solution.

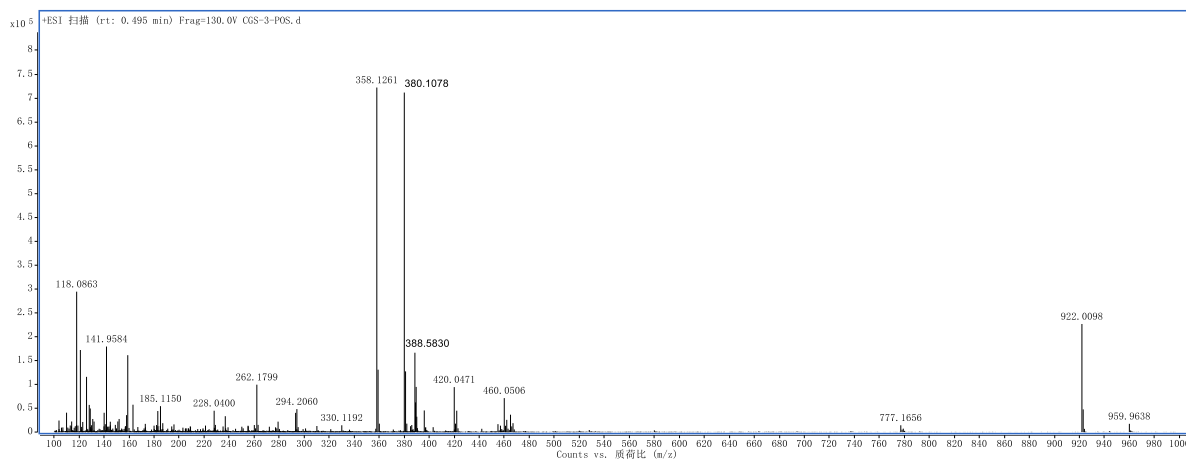

**Fig. S32** Positive-ion electrospray ionization mass spectrum (ESI-MS) of Cudbes in CH<sub>3</sub>CN in the presence of 30 equivalents of AcOH.

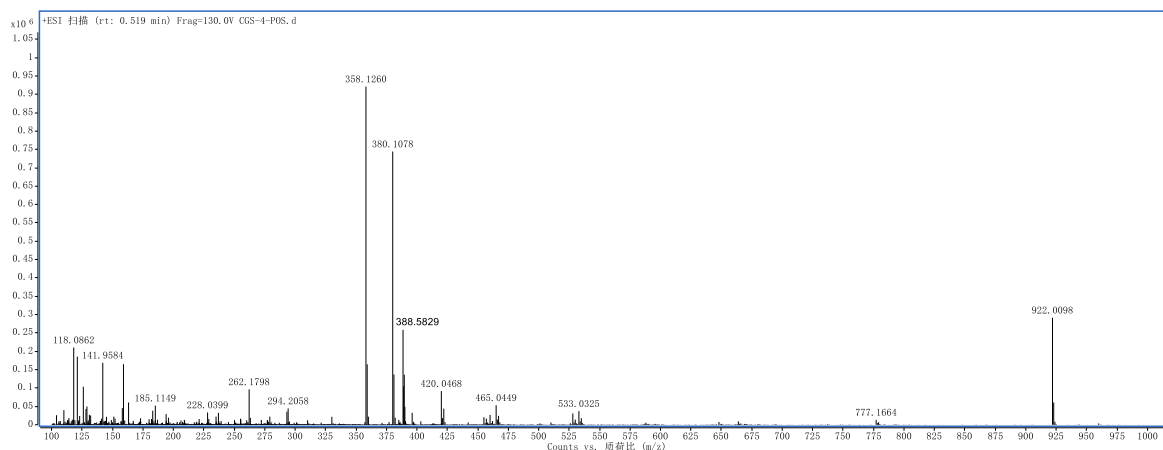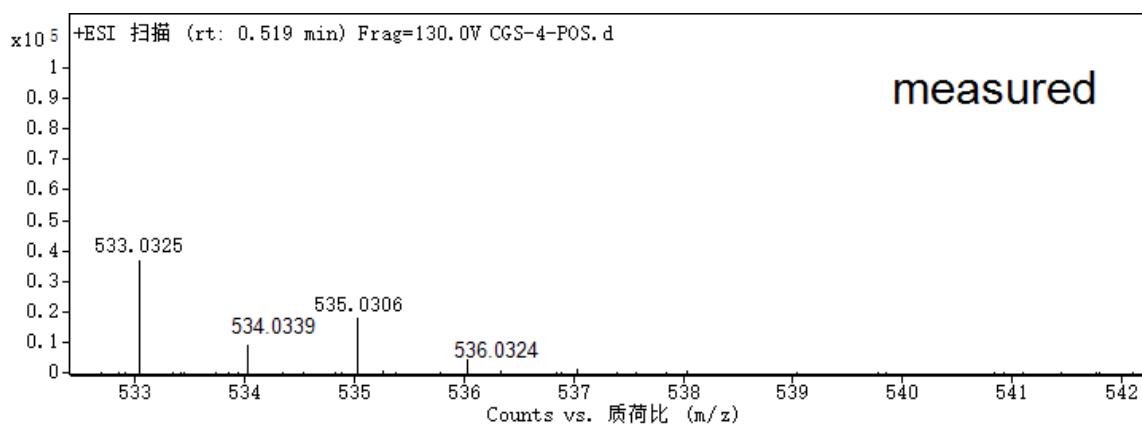

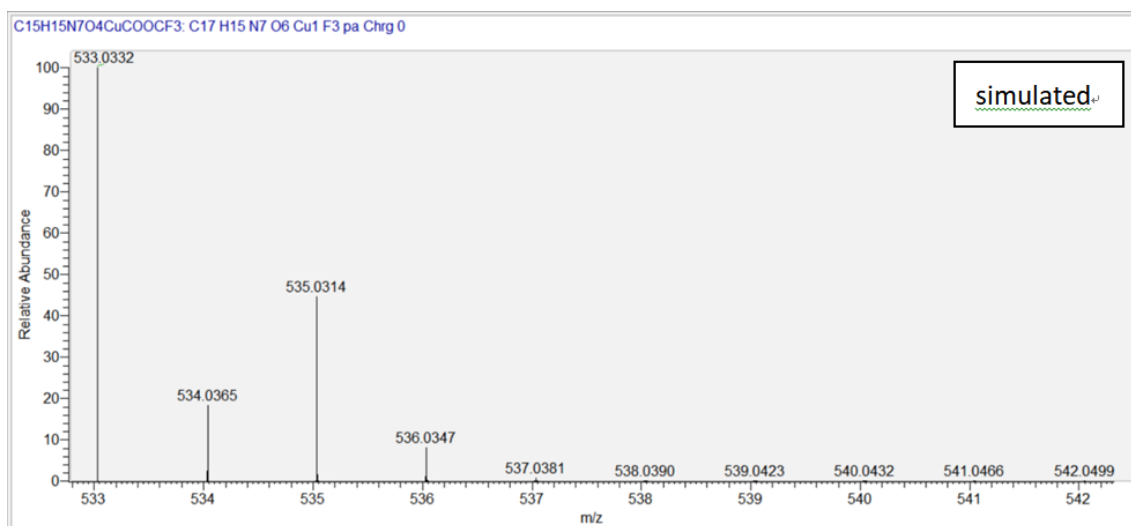

**Fig. S33** Positive-ion electrospray ionization mass spectra (ESI-MS) of Cudbes in  $\text{CH}_3\text{CN}$  in the presence of 30 equivalents of TFA.

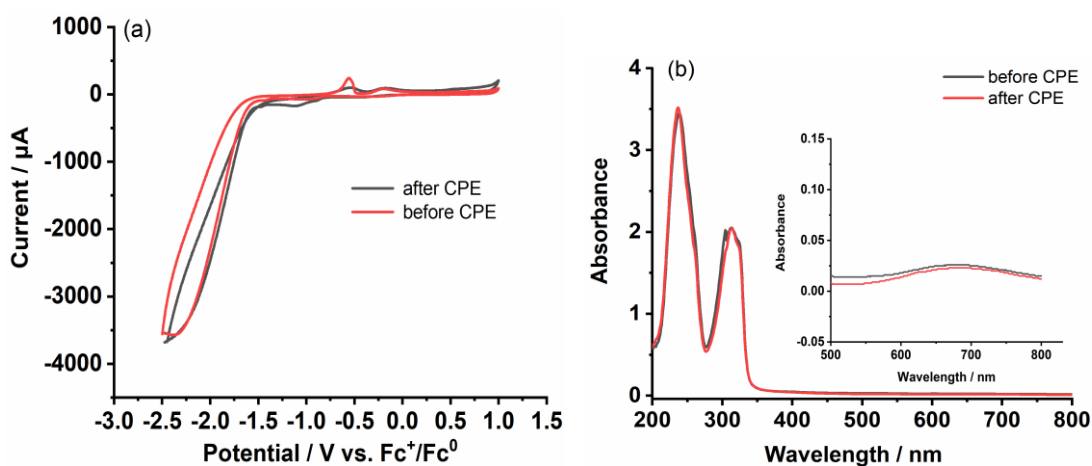

**Fig. S34** (a) Cyclic voltammograms and (b) UV-vis absorption spectra of 0.5 mM Cudbes before and after the electrolysis at  $-1.90$  V for 1 h. Conditions: in 0.1 M  $\text{TBAPF}_6$   $\text{CH}_3\text{CN}$  solution containing 200 equivalents of AcOH, glassy carbon working electrode, scan rate:  $0.1 \text{ V s}^{-1}$ .

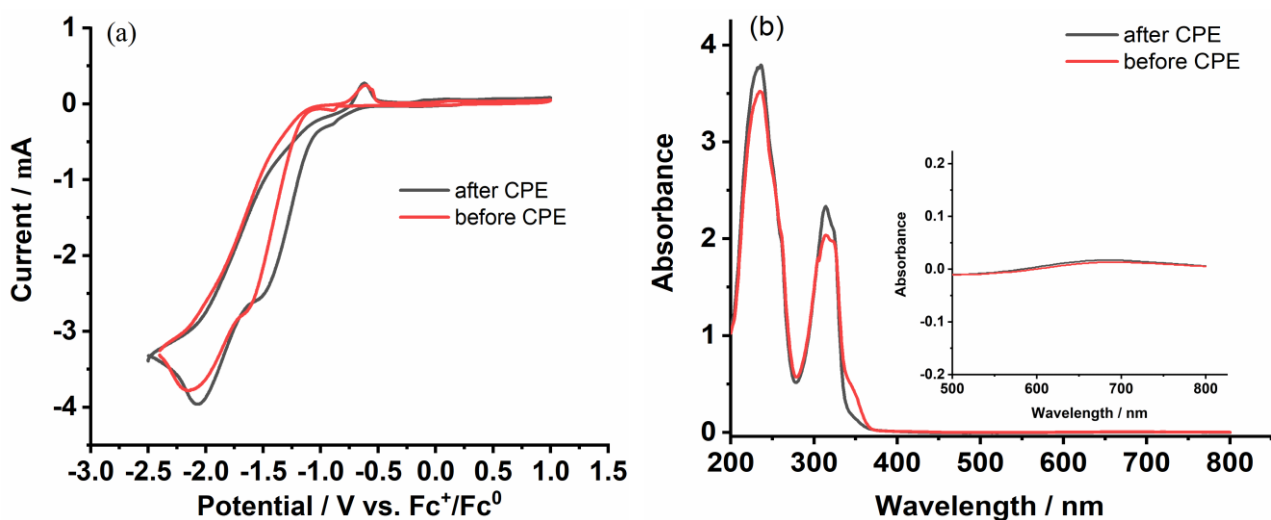

**Fig. S35** (a) Cyclic voltammograms and (b) UV-vis absorption spectra of 0.5 mM Cudbes before and after the electrolysis at -1.68 V for 1 h. Conditions: in 0.1 M TBAPF<sub>6</sub> CH<sub>3</sub>CN solution containing 88 equivalents of TFA, glassy carbon working electrode, scan rate: 0.1 V s<sup>-1</sup>.

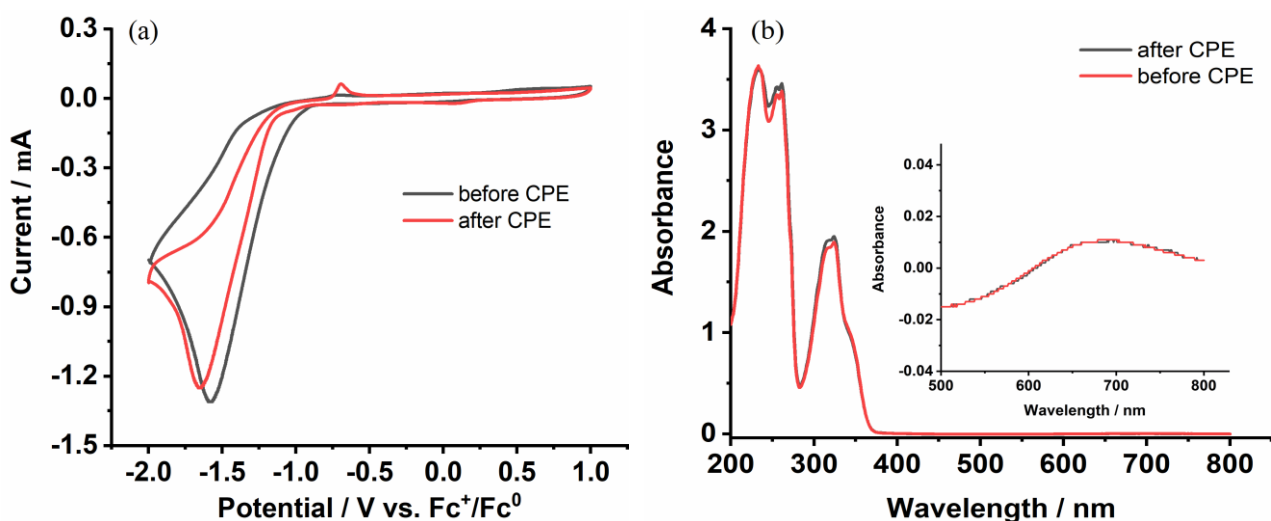

**Fig. S36** (a) Cyclic voltammograms and (b) UV-Vis absorption spectra of 0.5 mM Cudbes before and after the electrolysis at -1.77 V for 1 h. Conditions: in 0.1 M TBAPF<sub>6</sub> CH<sub>3</sub>CN solution containing 72 equivalents of TsOH, glassy carbon working electrode, scan rate: 0.1 V s<sup>-1</sup>.

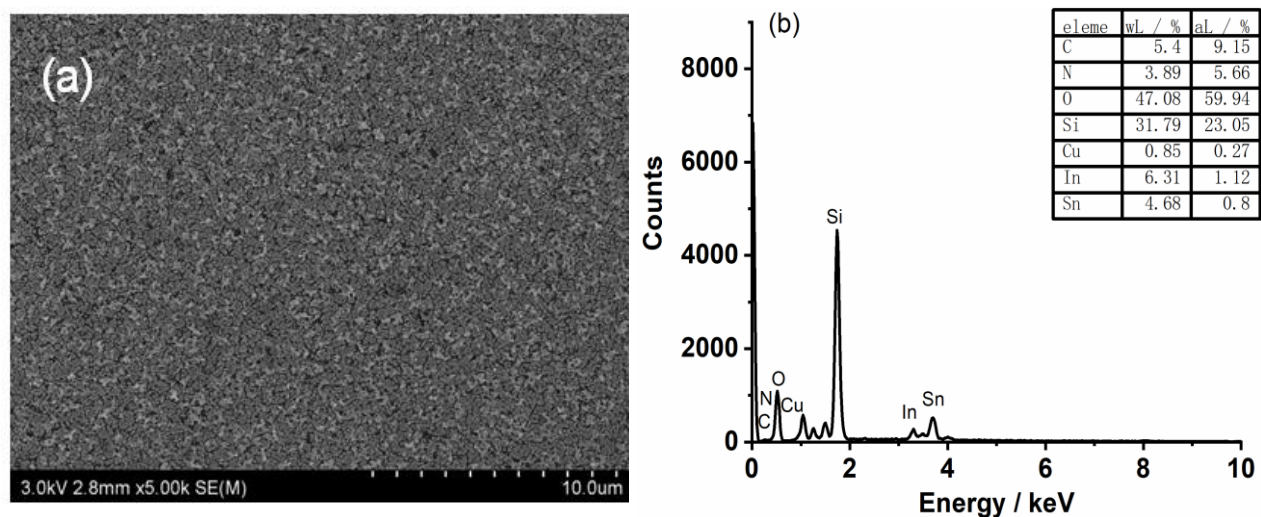

**Fig. S37** (a) SEM image and (b) EDS spectrum and data for an ITO electrode obtained from 20 consecutive cycles in 0.5 mM Cudbes  $\text{CH}_3\text{CN}$  solution with 200 equivalents of AcOH.

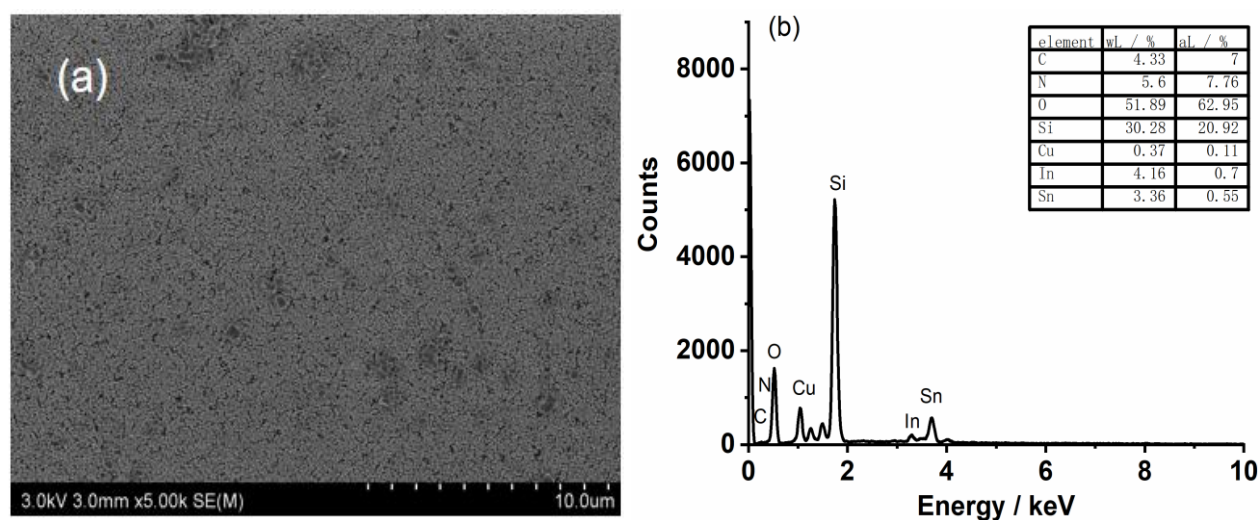

**Fig. S38** (a) SEM image and (b) EDS spectrum and data of the ITO electrode obtained from the electrolysis at -1.7 V for 1 h in 0.5 mM Cudbes  $\text{CH}_3\text{CN}$  solution with 200 equivalents of AcOH.

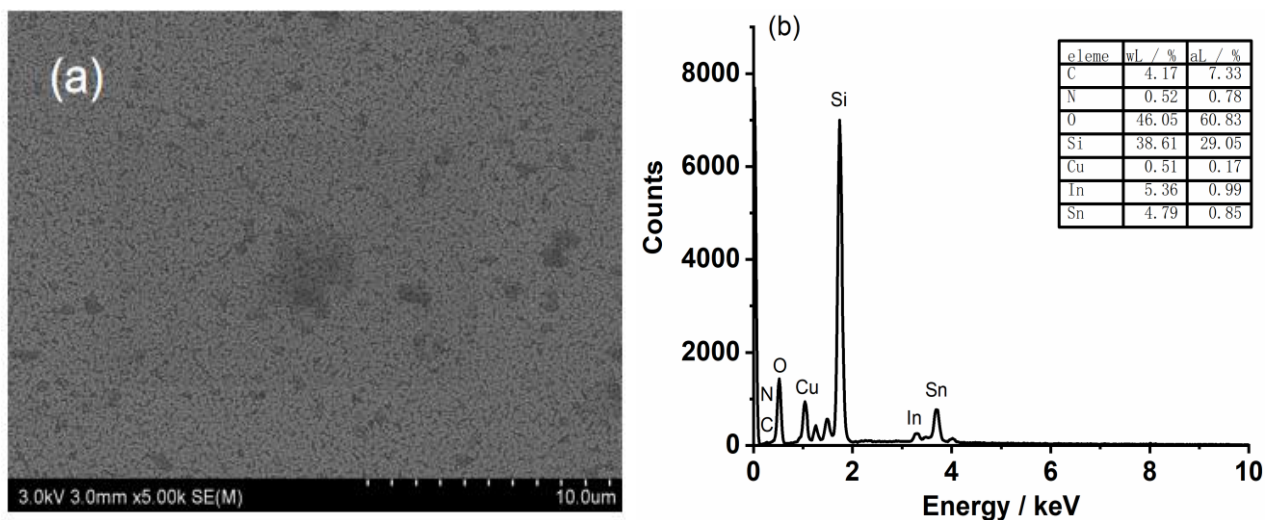

**Fig. S39** (a) SEM image and (b) EDS spectrum and data for an ITO electrode obtained from 20 consecutive cycles in 0.5 mM Cudbes CH<sub>3</sub>CN solution with 88 equivalents of TFA.

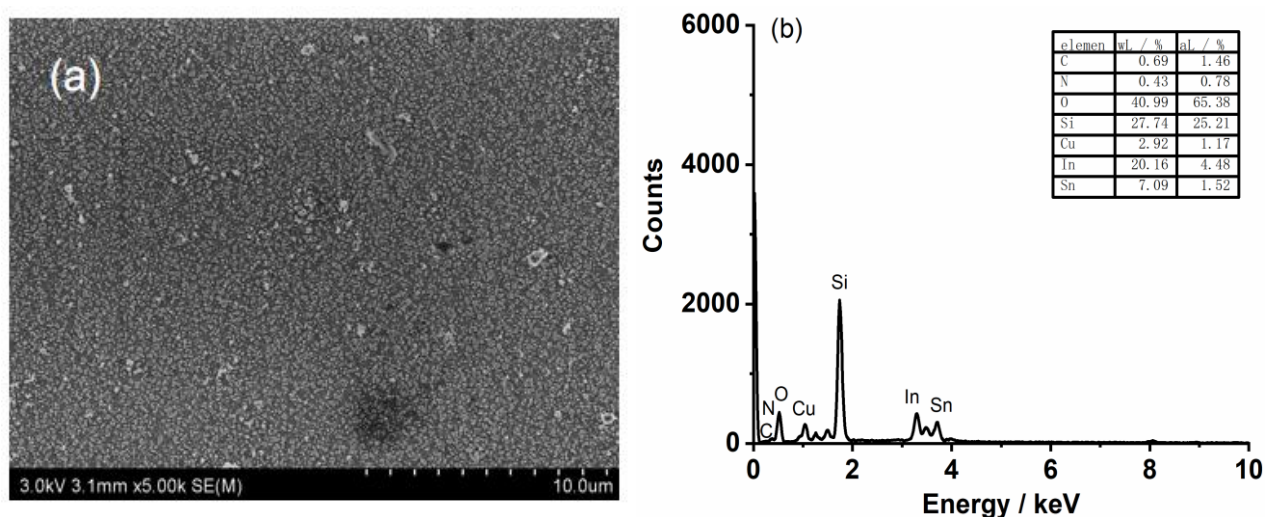

**Fig. S40** (a) SEM image and (b) EDS spectrum and data of the ITO electrode obtained from the electrolysis at -1.7 V for 1 h in 0.5 mM Cudbes CH<sub>3</sub>CN solution with 88 equivalents of TFA.

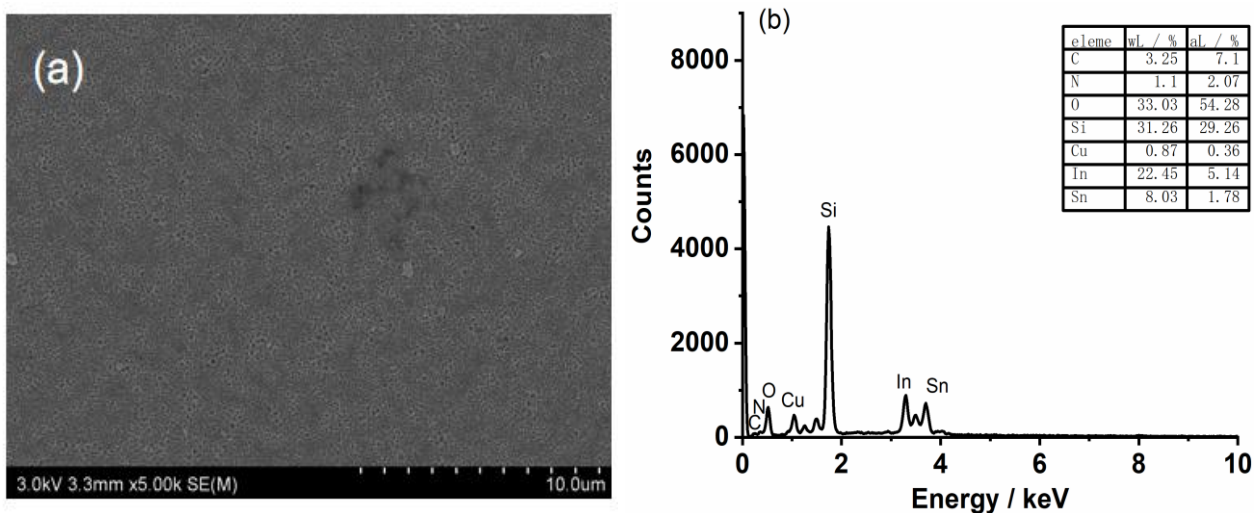

**Fig. S41** (a) SEM image and (b) EDS spectrum and data for an ITO electrode obtained from 20 consecutive cycles in 0.5 mM Cudbes  $\text{CH}_3\text{CN}$  solution with 72 equivalents of TsOH.

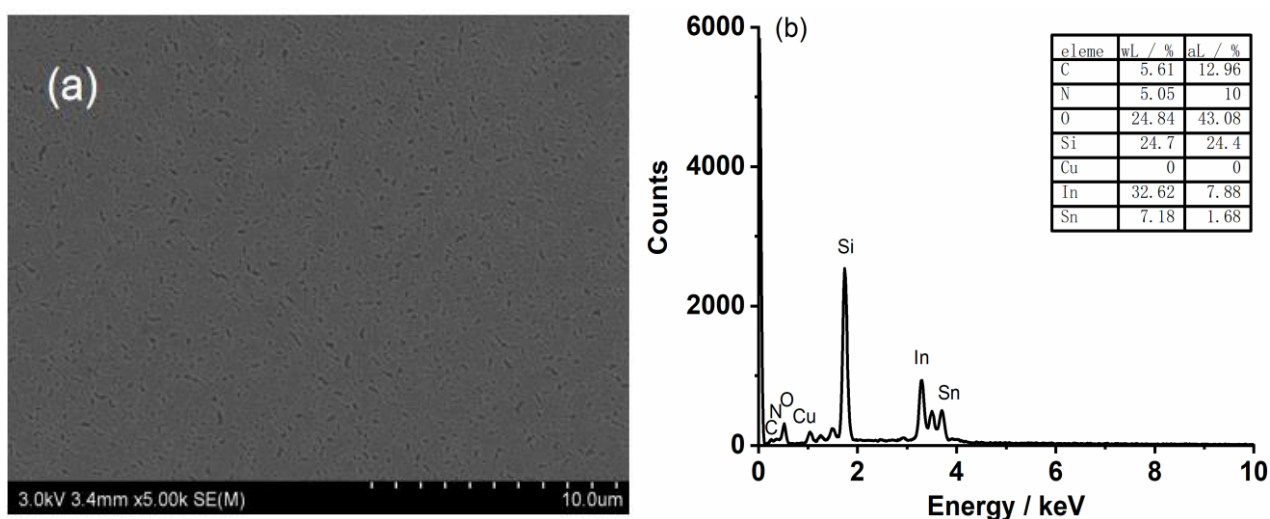

**Fig. S42** (a) SEM image and (b) EDS spectrum and data of the ITO electrode obtained from the electrolysis at -1.7 V for 1 h in 0.5 mM Cudbes  $\text{CH}_3\text{CN}$  solution with 72 equivalents of TsOH.



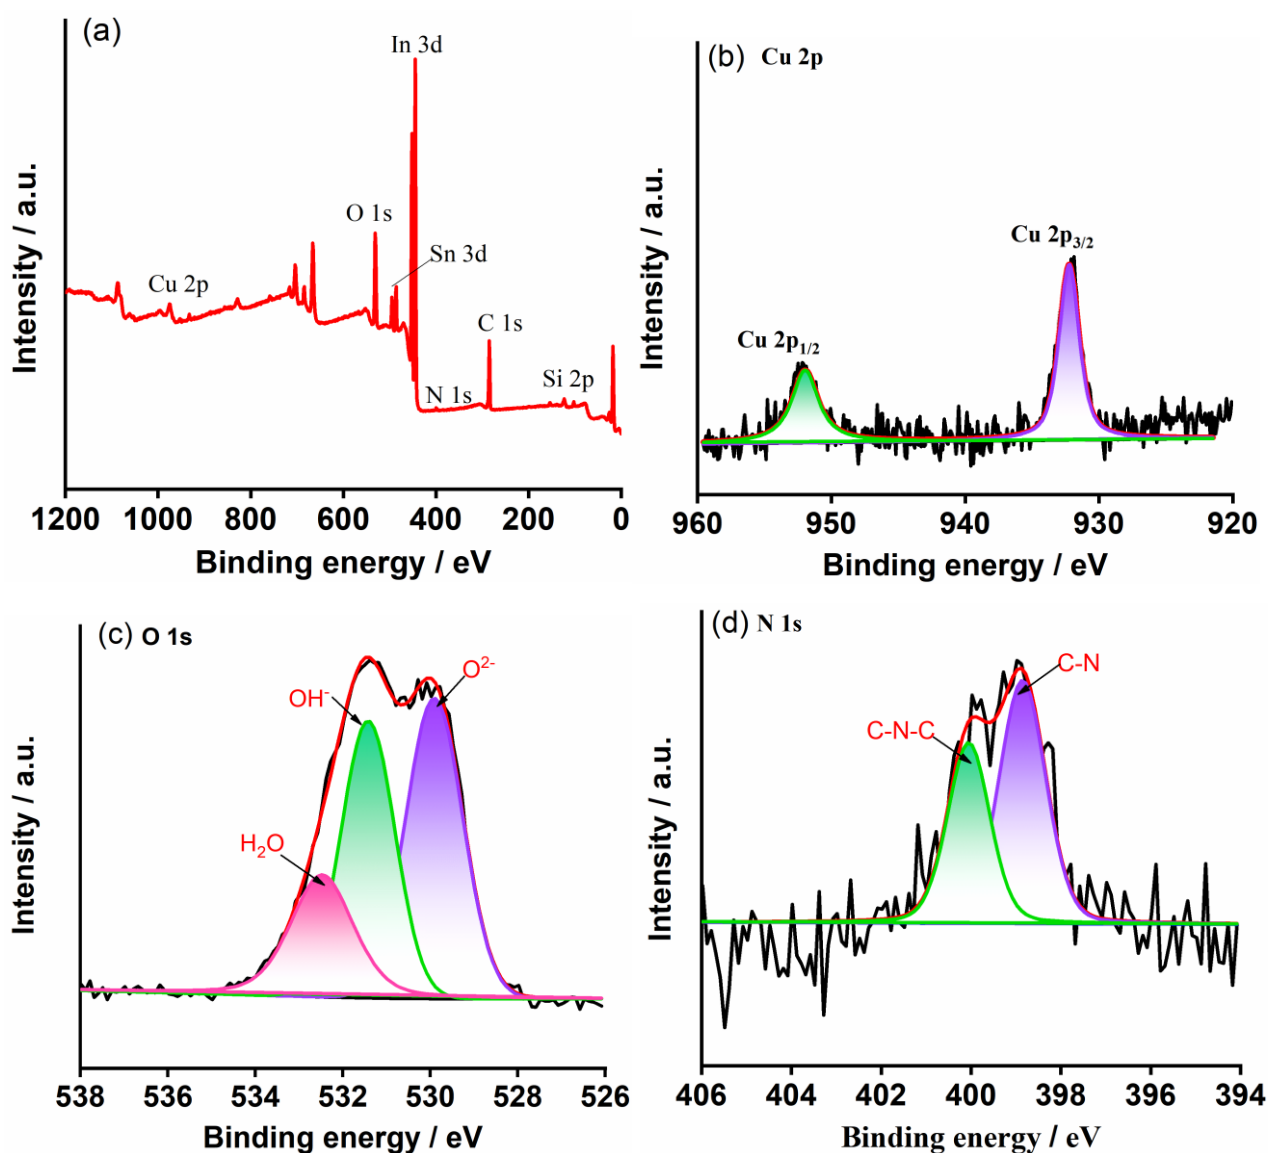

**Fig. S43** (a) XPS survey data of the ITO electrode obtained from the electrolysis at -1.7 V for 1 h in 0.5 mM Cudbes CH<sub>3</sub>CN solution with 200 equivalents of AcOH, (b) high-resolution XPS spectrum of Cu 2p region, (c) high-resolution XPS spectrum of O 1s region, (d) high-resolution XPS spectrum of N 1s region.

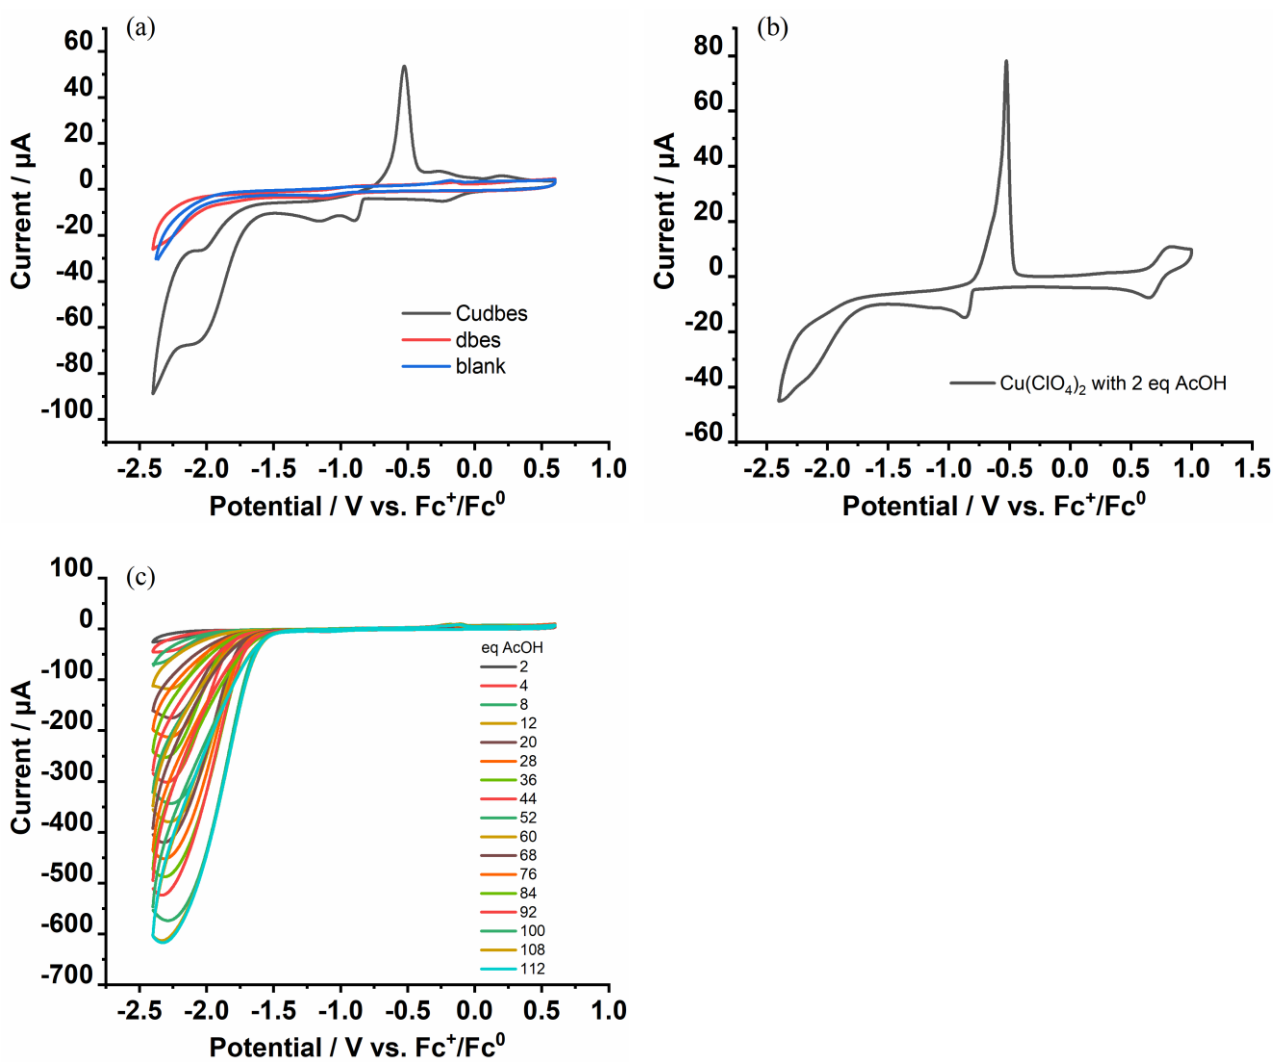

**Fig. S44** (a) Cyclic voltammograms of Cudbes, dbes and blank solution in the presence of 2 equivalents of AcOH. (b)  $\text{Cu}(\text{ClO}_4)_2$  with 2 equivalents of AcOH. (c) dbes with different concentrations of AcOH. Conditions: in 0.1 M  $\text{TBAPF}_6$   $\text{CH}_3\text{CN}$  solution, glassy carbon working electrode, scan rate:  $0.1 \text{ V s}^{-1}$ . Sample concentration: 0.5 mM.

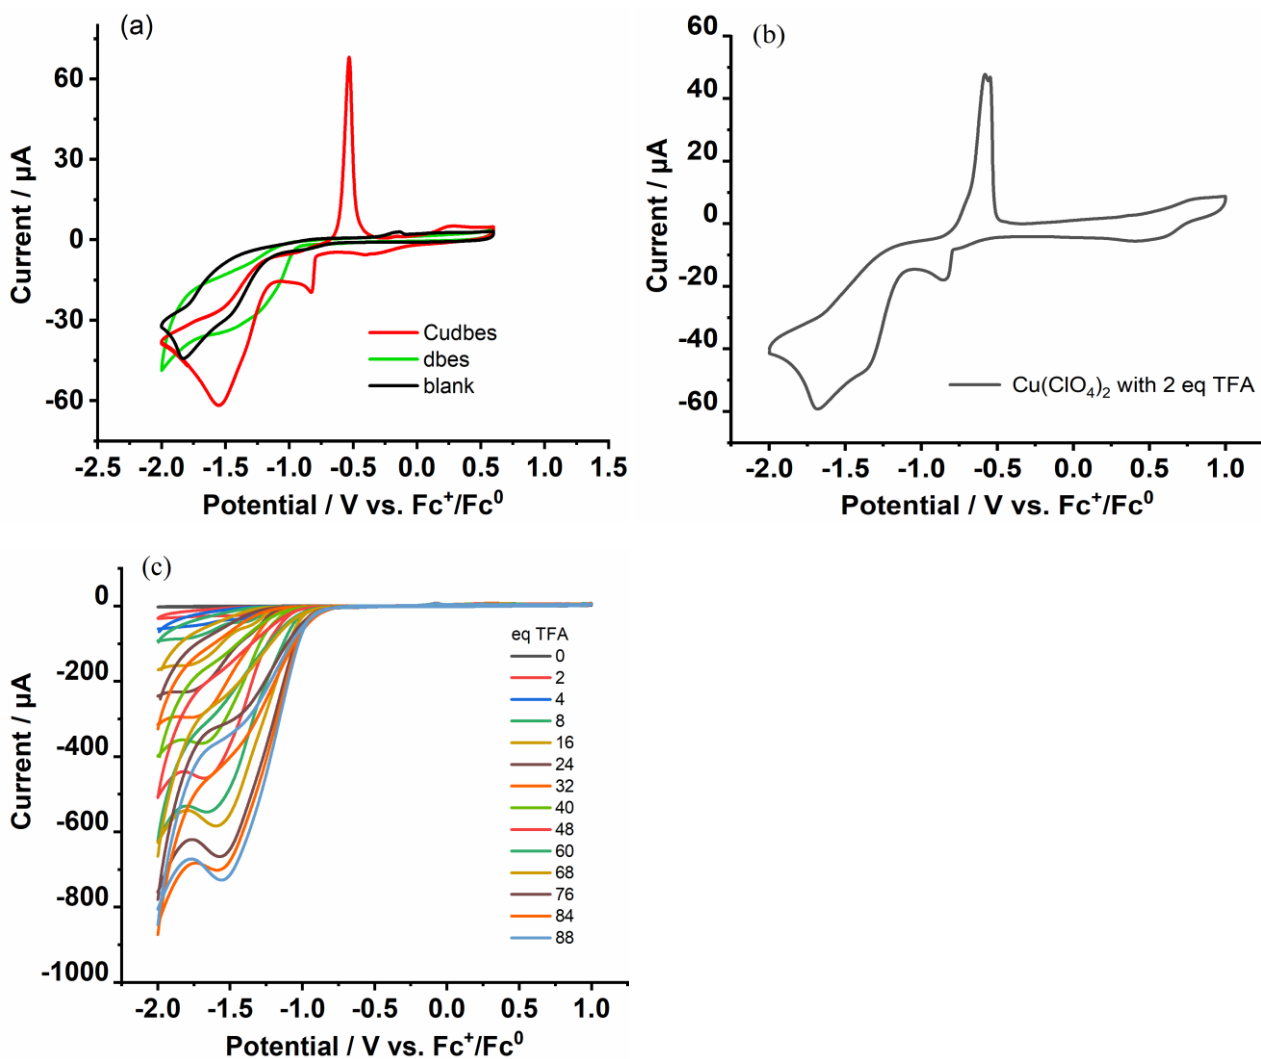

**Fig. S45** (a) Cyclic voltammograms of Cudbes, dbes and blank solution in the presence of 2 equivalents of TFA. (b)  $\text{Cu}(\text{ClO}_4)_2$  with 2 equivalents of TFA. (c) dbes with different concentrations of TFA. Conditions: in 0.1 M  $\text{TBAPF}_6\text{CH}_3\text{CN}$  solution, glassy carbon working electrode, scan rate:  $0.1 \text{ V s}^{-1}$ . Sample concentration: 0.5 mM.

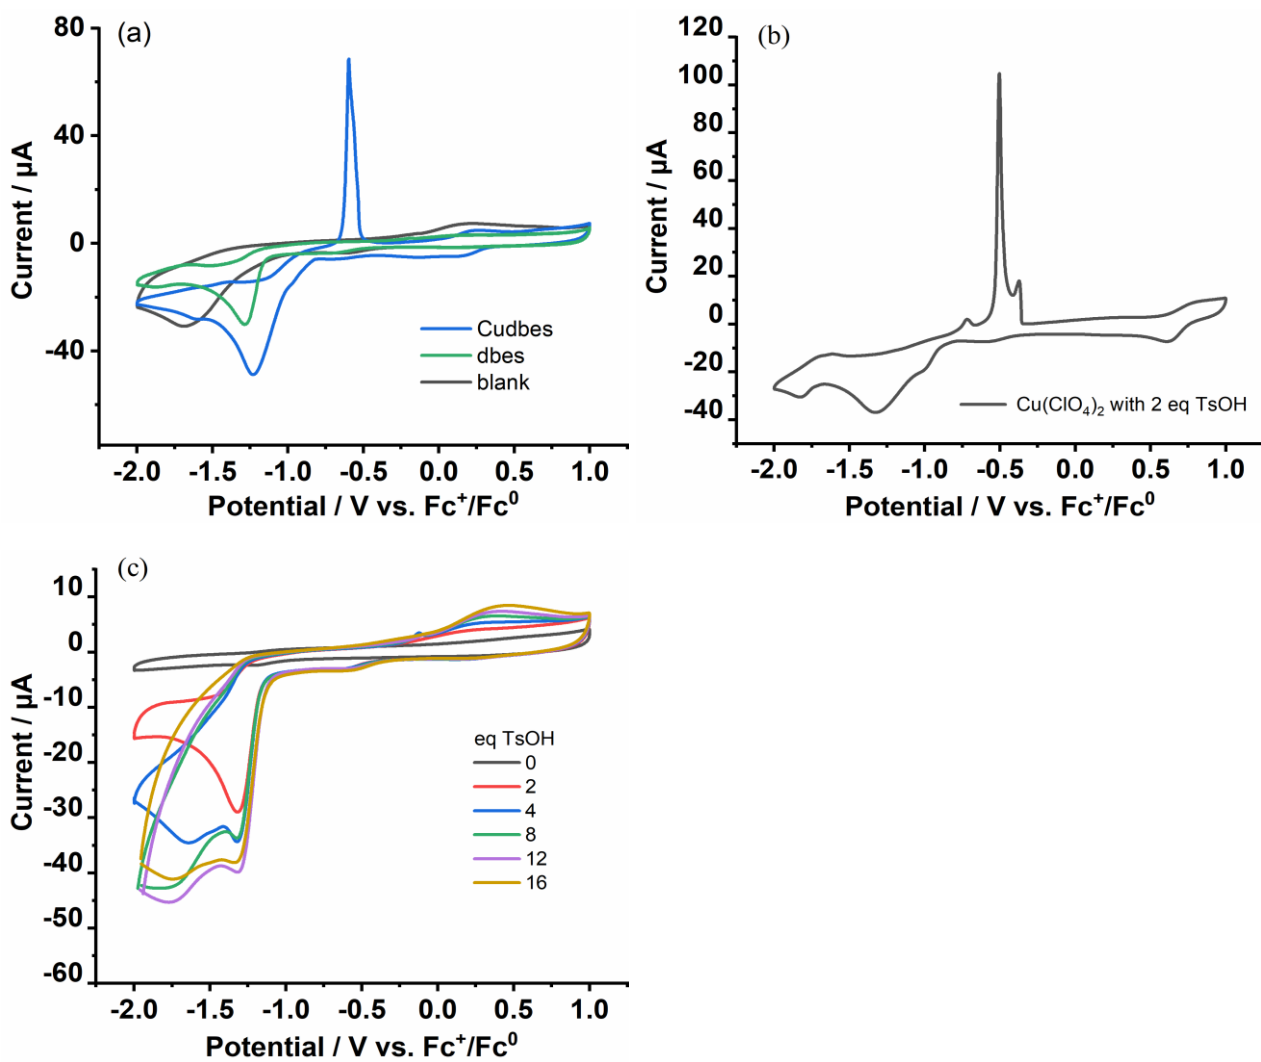

**Fig. S46** (a) Cyclic voltammograms of Cudbes, dbes and blank solution in the presence of 2 equivalents of TsOH. (b)  $\text{Cu}(\text{ClO}_4)_2$  with 2 equivalents of TsOH. (c) dbes with different concentrations of TsOH. Conditions: in 0.1 M  $\text{TBAPF}_6$   $\text{CH}_3\text{CN}$  solution, glassy carbon working electrode, scan rate:  $0.1 \text{ V s}^{-1}$ . Sample concentration: 0.5 mM.

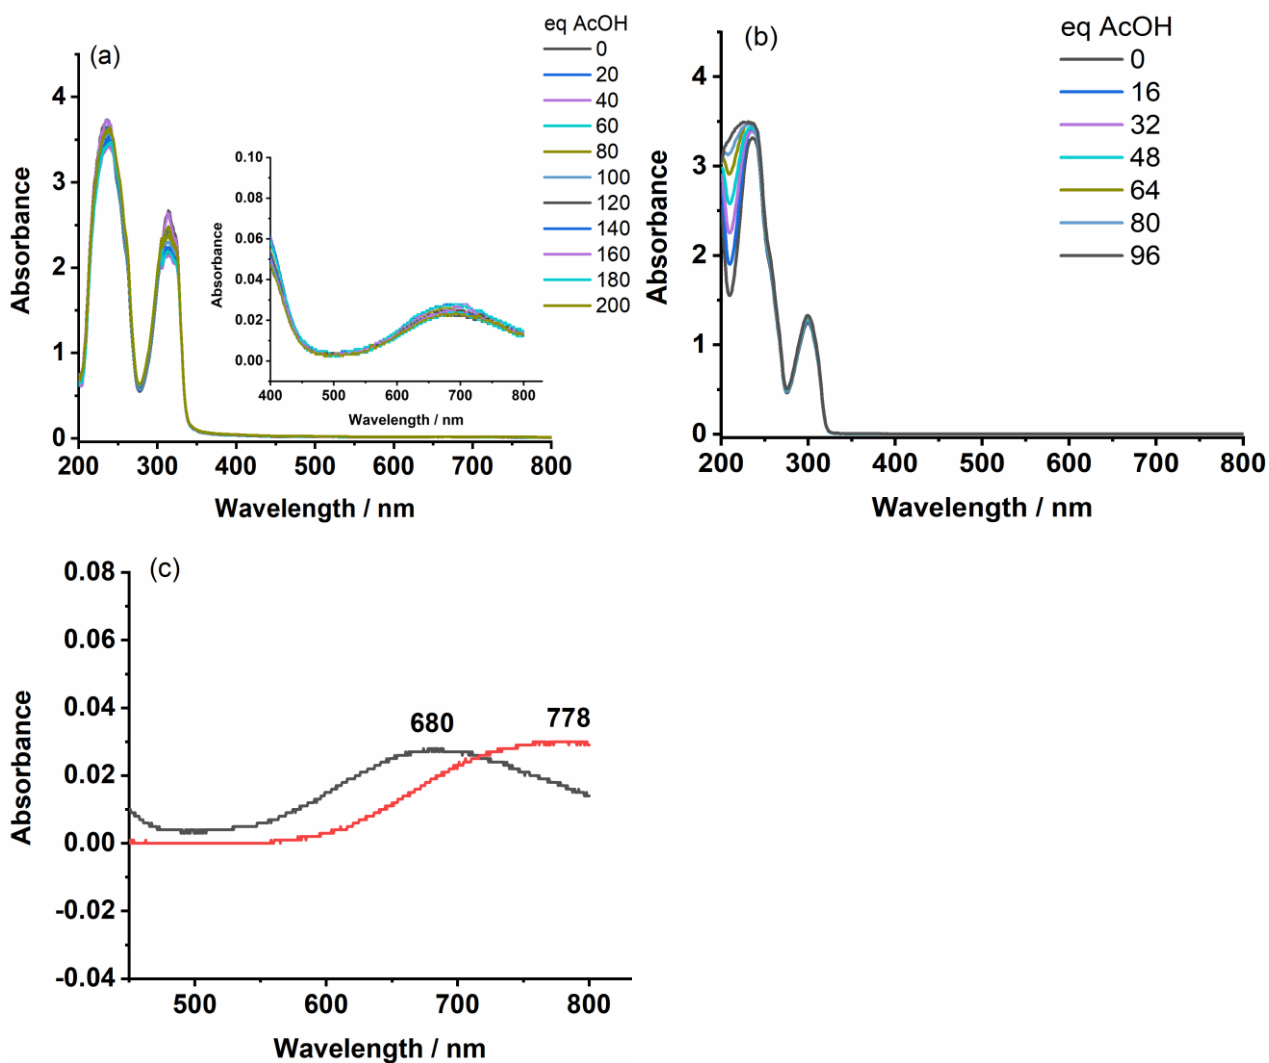

**Fig. S47** UV-vis absorption spectra of (a) Cudbes in  $\text{CH}_3\text{CN}$  in the presence of AcOH (0-200 equivalents), (b) dbes in  $\text{CH}_3\text{CN}$  with AcOH (0-96 equivalents), (c)  $\text{Cu}(\text{ClO}_4)_2$  (red line) and Cudbes (black line) in  $\text{CH}_3\text{CN}$  with 200 equivalents of AcOH. Sample concentration: 0.1 mM.

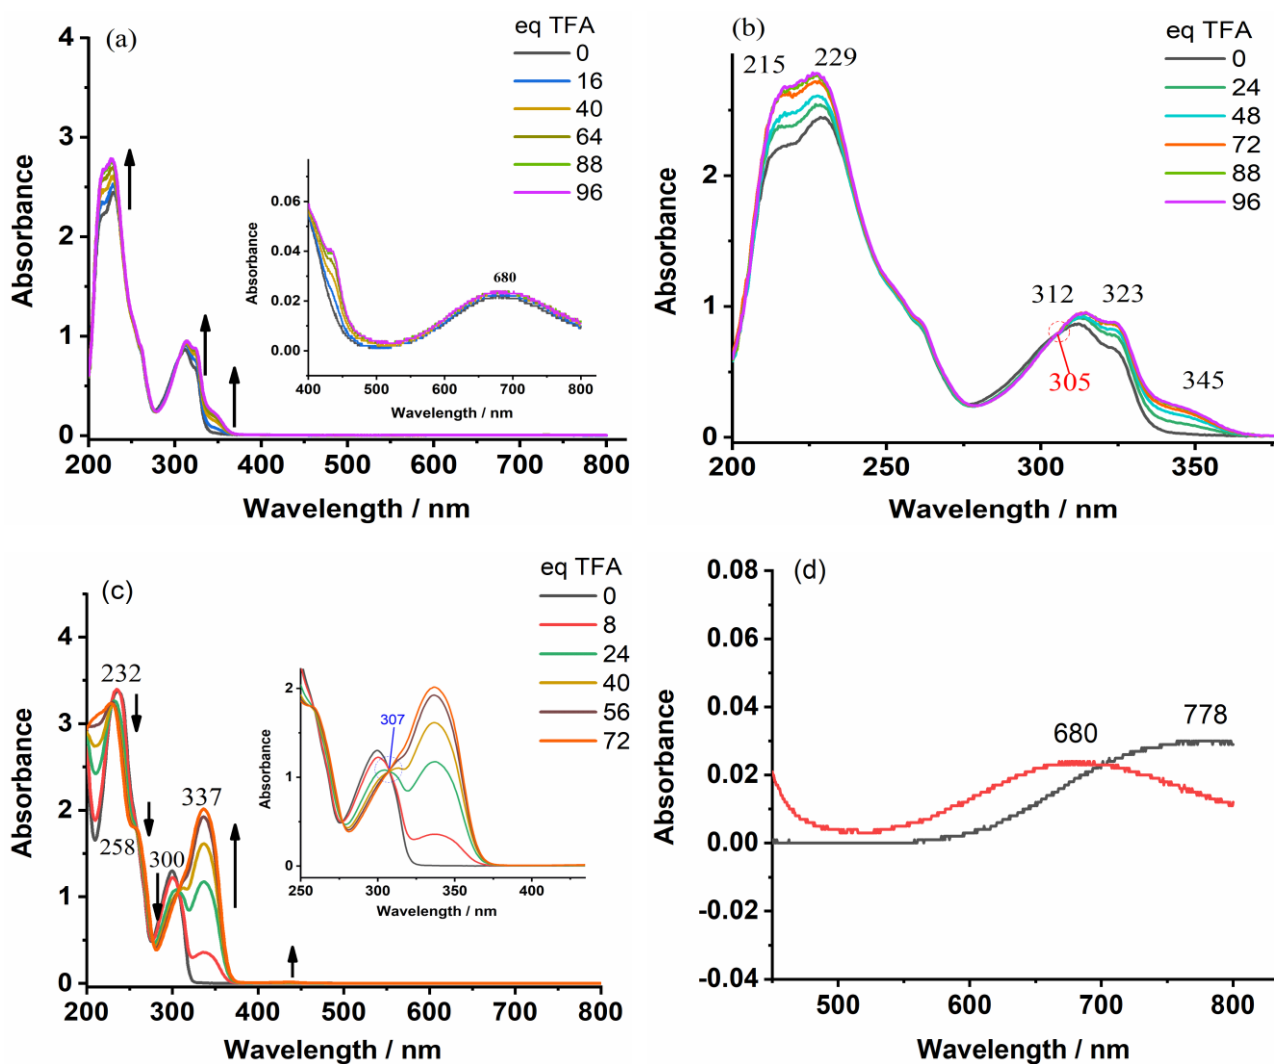

**Fig. S48** (a) UV-vis absorption spectra of Cudbes in CH<sub>3</sub>CN with TFA (0-96 equivalents), (b) Enlarged view of Fig. (a). (c) UV-vis absorption spectra of dbes in CH<sub>3</sub>CN with TFA (0-72 equivalents). (d) UV-vis absorption spectra of Cu(ClO<sub>4</sub>)<sub>2</sub> (black line) and Cudbes (red line) in CH<sub>3</sub>CN with 88 equivalents of TFA. Sample concentration: 0.1 mM.

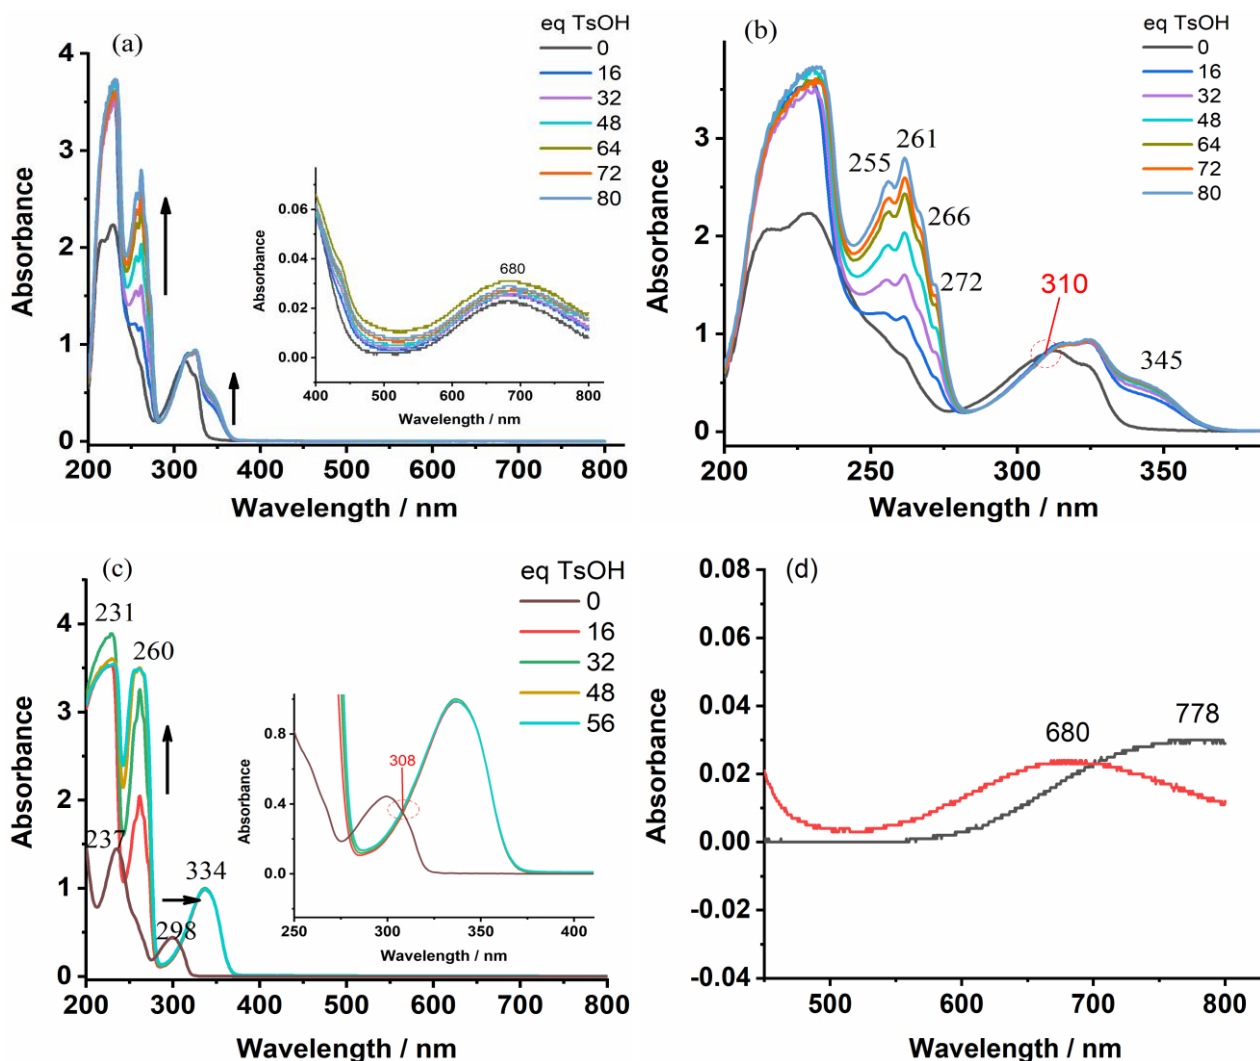

**Fig. S49** (a) UV-vis absorption spectra of Cudbes in CH<sub>3</sub>CN with TsOH (0-80 equivalents). (b) Enlarged view of Fig. (a). (c) UV-vis absorption spectra of dbes in CH<sub>3</sub>CN with TsOH (0-56 equivalents). (d) UV-vis absorption spectra of Cu(ClO<sub>4</sub>)<sub>2</sub> (black line) and Cudbes (red line) in CH<sub>3</sub>CN with 72 equivalents of TsOH. Sample concentration: 0.1 mM.

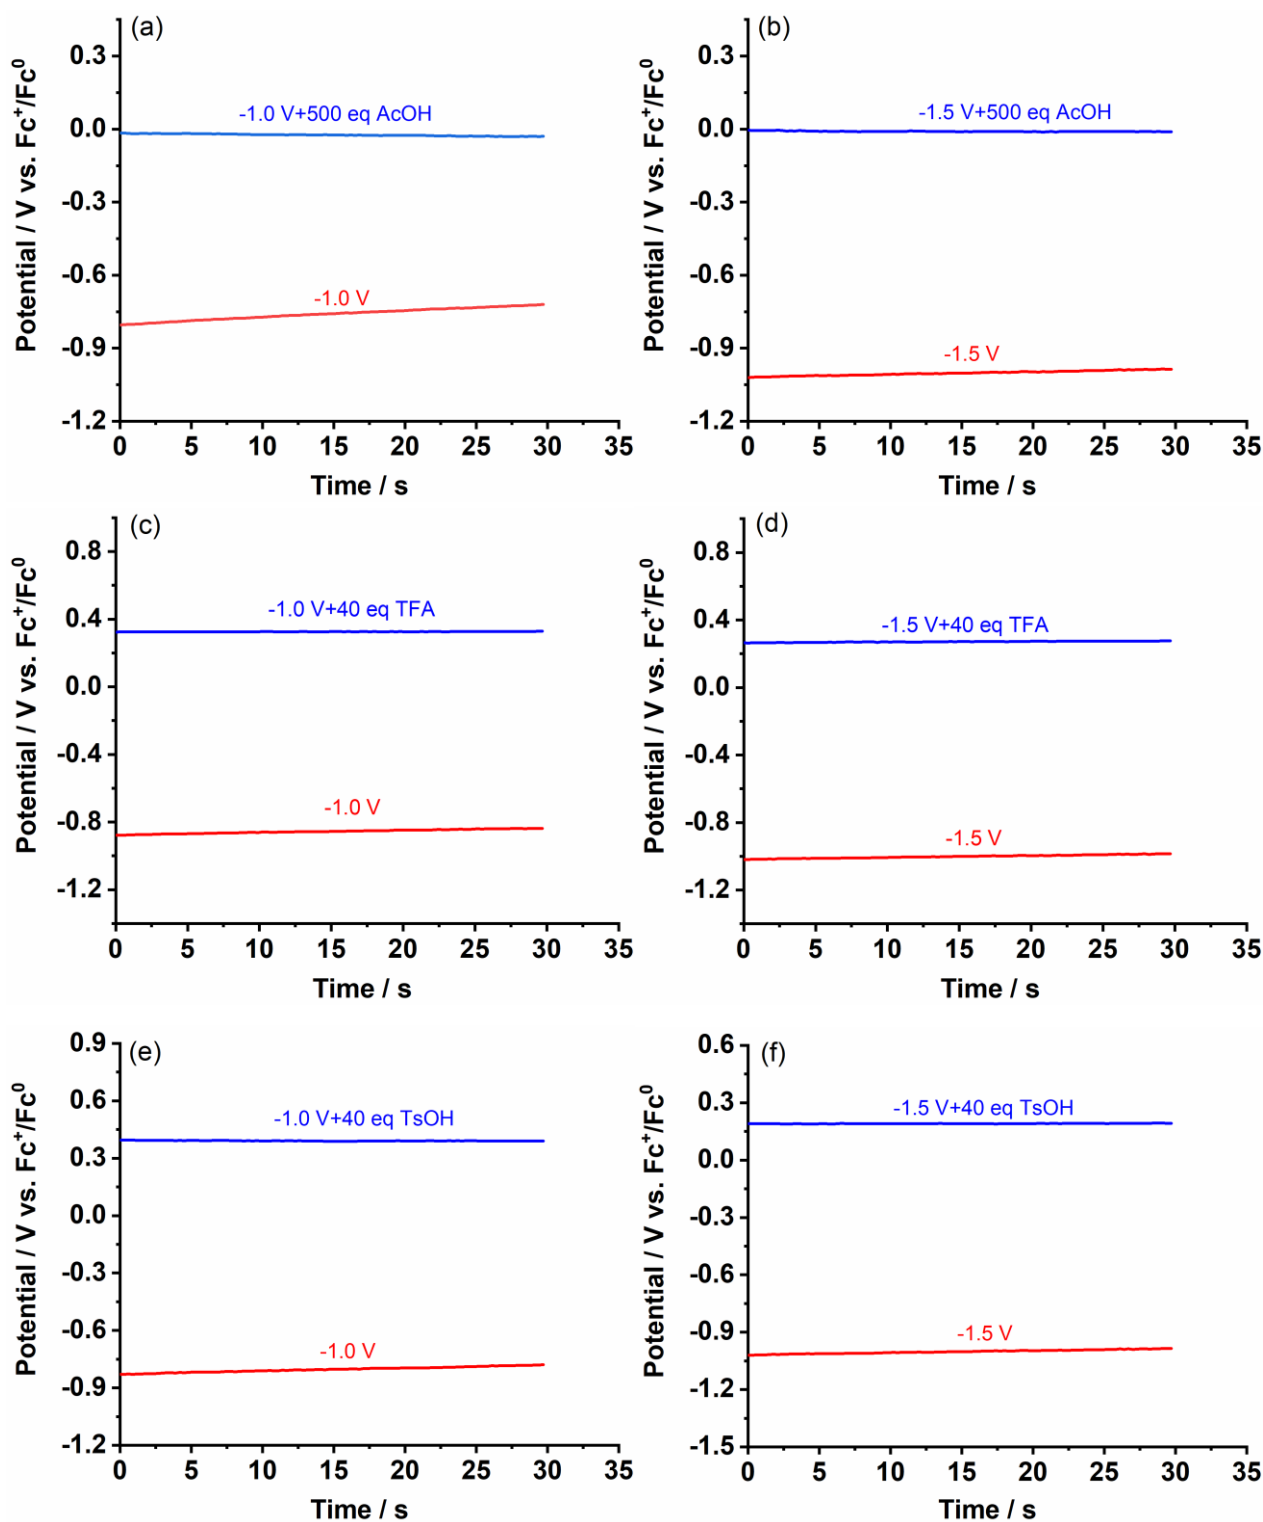

**Fig. S50** Plots of time-dependent open circuit potential (OCP) of 0.5 mM Cudbes in 0.1 M TBAPF<sub>6</sub> CH<sub>3</sub>CN solution: (a) after the electrolysis at -1.0 V (red line), after the electrolysis at -1.0 V and subsequently adding 500 equivalents of AcOH (blue line), (b) after the electrolysis at -1.5 V (red line), after the electrolysis at -1.5 V and subsequently adding 500 equivalents of AcOH (blue line), (c) after the electrolysis at -1.0 V (red line), after the electrolysis at -1.0 V and subsequently adding



40 equivalents of TFA (blue line), (d) after the electrolysis at -1.5 V (red line), after the electrolysis at -1.5 V and subsequently adding 40 equivalents of TFA (blue line), (e) after the electrolysis at -1.0 V (red line), after the electrolysis at -1.0 V and subsequently adding 40 equivalents of TsOH (blue line), (f) after the electrolysis at -1.5 V (red line), after the electrolysis at -1.5 V and subsequently adding 40 equivalents of TsOH (blue line).

**Table S4** Comparison of the catalytic data for HER mediated by Cu-dbes and copper analogues

| Catalyst  | Medium                                                             | Proton source | Overpotential (mV) | TOF (s <sup>-1</sup> ) | Faradaic efficiency (%) | Ref.      |
|-----------|--------------------------------------------------------------------|---------------|--------------------|------------------------|-------------------------|-----------|
| <b>1</b>  | CH <sub>3</sub> CN (0.1 M TBAPF <sub>6</sub> )                     | AcOH          | 550                | 1377                   | 99                      | This work |
|           |                                                                    | TFA           | 525                | 536                    | 98                      |           |
|           |                                                                    | TsOH          | 520                | 519                    | 99                      |           |
| <b>2</b>  | CH <sub>3</sub> CN (0.10 M [n-Bu <sub>4</sub> N]ClO <sub>4</sub> ) | AcOH          | 914.6              | 262                    | -                       | 7         |
| <b>3</b>  | CH <sub>3</sub> CN (0.10 M [n-Bu <sub>4</sub> N]ClO <sub>4</sub> ) | AcOH          | 914.6              | 220                    | -                       | 7         |
| <b>4</b>  | DMF (0.1 M TBAP)                                                   | AcOH          | 130                | 2058.72                | 77.77                   | 8         |
| <b>5</b>  | DMF (0.10 M [n-Bu <sub>4</sub> N]ClO <sub>4</sub> )                | AcOH          | 817                | 457                    | 91.5                    | 9         |
| <b>6</b>  | H <sub>2</sub> O (0.1 M KCl)                                       | AcOH          | -                  | 49.81                  | -                       | 10        |
| <b>7</b>  | DMF (0.1 M TBAP)                                                   | TsOH          | 715                | 138                    | -                       | 11        |
| <b>8</b>  | CH <sub>3</sub> CN (0.1 M TBAP)                                    | TFA           | -                  | 356                    | 74                      | 12        |
| <b>9</b>  | CH <sub>3</sub> CN (0.1 M TBAP)                                    | TFA           | -                  | 227                    | -                       | 12        |
| <b>10</b> | CH <sub>3</sub> CN (0.1 M TBAP)                                    | TFA           | -                  | 49                     | -                       | 12        |
| <b>11</b> | DMSO (0.10 M [(n-Bu) <sub>4</sub> N]ClO <sub>4</sub> )             | AcOH          | -                  | -                      | 19.63                   | 13        |
|           |                                                                    | TFA           | -                  | -                      | 56.56                   |           |
|           |                                                                    | TsOH          | -                  | -                      | 61.75                   |           |
| <b>12</b> | CH <sub>3</sub> CN (0.1 M Bu <sub>4</sub> NPF <sub>6</sub> )       | AcOH          | 230                | -                      | -                       | 14        |
| <b>13</b> | CH <sub>3</sub> CN (0.1 M Bu <sub>4</sub> NPF <sub>6</sub> )       | AcOH          | 540                | -                      | -                       | 15        |
| <b>14</b> | DMF (0.1 M Bu <sub>4</sub> NPF <sub>6</sub> )                      | AcOH          | -                  | 382                    | 83                      | 16        |

|           |                                                  |      |     |      |    |    |
|-----------|--------------------------------------------------|------|-----|------|----|----|
| <b>15</b> | DMF (0.1 M<br>Bu <sub>4</sub> NPF <sub>6</sub> ) | AcOH | 680 | 427  | 47 | 16 |
| <b>16</b> | DMF (0.1 M<br>Bu <sub>4</sub> NPF <sub>6</sub> ) | AcOH | 610 | 1168 | 89 | 16 |
| <b>17</b> | DMF (0.1 M<br>Bu <sub>4</sub> NPF <sub>6</sub> ) | AcOH | 710 | 564  | 50 | 16 |

[Cu<sup>II</sup>-en-P<sub>2</sub>(NCMe)](ClO<sub>4</sub>)<sub>2</sub> (en-P<sub>2</sub> = N,N'-bis[o-(diphenylphosphino)benzylidene]ethylenediamine) (**2**)

[Cu<sup>I</sup>-en-P<sub>2</sub>]ClO<sub>4</sub> (en-P<sub>2</sub> = N,N'-bis[o-(diphenylphosphino)benzylidene]ethylenediamine) (**3**)

[CuL] (H<sub>2</sub>L = 1,1'-(1E,1'E)-(propane-1,2-diylbis(azan-1-yl-1-ylidene))bis(methan-1-yl-1-ylidene)dinaphthalen-2-ol) (**4**)

[CuL] (H<sub>2</sub>L = 2,3-bis(2-hydroxybenzylideneimino)-2,3-butenedinitrile) (**5**)

[Cu(2,2'-dipyridylamine)<sub>2</sub>(azide ion)]Cl 4H<sub>2</sub>O (**6**)

[Cu(5,15-bis(pentafluorophenyl)-10-[4-(1H-imidazole) phenyl]-corrole)] (**7**)

[Cu(2,3,17-Tris(trifluoromethyl)-5,10,15-tris(pentafluorophenyl)corrole)] (**8**)

[Cu(2,3,17,18-Tetrakis(trifluoromethyl)-5,10,15-tris(pentafluorophenyl)corrole)] (**9**)

[Cu(5,10,15-tris(pentafluorophenyl)corrole)] (**10**)

[Cu(meso-5,10,15,20-tetrakis(carboxyl)porphyrin)] (**11**)

[Cu<sup>II</sup>(L<sup>Et</sup>)]BF<sub>4</sub> (HL<sup>Et</sup> (from [1 + 1] condensation of 2,2'-iminobisbenzaldehyde (dpa) and diethylenetriamine)) (**12**)

[Cu<sup>II</sup><sub>2</sub>(bis-L<sup>Et</sup>)](BF<sub>4</sub>)<sub>2</sub> (bis-HL<sup>Et</sup> (from two HL<sup>Et</sup> Schiff base macrocycles ( prepared by 1 + 1 condensation of 2,2'-iminobisbenzaldehyde and diethylenetriamine)) (**13**)

[Cu<sup>II</sup> (1,10-phenanthroline-2,6-bis( phenylselanyl)phenol)] (**14**)

[Cu<sup>II</sup> (1,10-phenanthroline-4-methyl-2,6-bis( phenylselanyl)phenol)] (**15**)

[Cu<sup>II</sup> (1,10-phenanthroline- 5,5'selenobis(4-hydroxy-3-( phenylselanyl) benzaldehyde)] (**16**)

[Cu<sup>II</sup> (1,10-phenanthroline- 5,5'selenobis(4-hydroxy-3-( phenylselanyl)benzotrile)] (**17**)

## References

1 C. Campana, J. Kaercher, J. Chambers and V. Petricek, Processing twinned-modulated and

- composite structures from CCD / CMOS images, *Acta Crystallogr. Sect. Found. Adv.*, 2014, **70**, C173–C173.
- 2 G. M. Sheldrick, Crystal structure refinement with *SHELXL*, *Acta Crystallogr. Sect. C Struct. Chem.*, 2015, **71**, 3–8.
  - 3 L. J. Farrugia, *ORTEP -3* for windows - a version of *ORTEP -III* with a graphical user interface (GUI), *J. Appl. Crystallogr.*, 1997, **30**, 565–565.
  - 4 W. L. J. Loke, C. Hu and W. Y. Fan, Tetrahedral Cu(I) complexes as electrocatalysts for the reduction of protons to dihydrogen gas, *Eur. J. Inorg. Chem.*, 2021, **2021**, 2499–2504.
  - 5 A. M. Appel and M. L. Helm, Determining the overpotential for a molecular electrocatalyst, *ACS Catal.*, 2014, **4**, 630–633.
  - 6 J.-X. Hao, Z.-W. Liu, S.-Y. Xu, L.-P. Si, L.-M. Wang and H.-Y. Liu, Electrocatalytic hydrogen evolution by cobalt(III) triphenyl corrole bearing different number of trifluoromethyl groups, *Inorg. Chim. Acta*, 2024, **564**, 121967.
  - 7 H. Yang, J. Du, C.-L. Wang and S.-Z. Zhan, Synthesis, structures, characterizations and catalytic behaviors for hydrogen evolution of copper(II) and copper(I) complexes supported by diiminodiphosphines, *Inorg. Chem. Commun.*, 2021, **130**, 108719.
  - 8 A. Barma, M. Chakraborty, S. K. Bhattacharya and P. Roy, Mononuclear nickel and copper complexes as electrocatalyst for generation of hydrogen from acetic acid, *Inorg. Chem. Commun.*, 2023, **150**, 110521.
  - 9 J.-P. Cao, T. Fang, L.-Z. Fu, L.-L. Zhou and S.-Z. Zhan, First mononuclear copper(II) electrocatalyst for catalyzing hydrogen evolution from acetic acid and water, *Int. J. Hydrog. Energy*, 2014, **39**, 13972–13978.
  - 10 N. Diyali, M. Chettri, S. Saha, A. Saha, S. Kundu, D. Mondal, D. Dhak and B. Biswas, Electrocatalytic hydrogen production activity with a copper(II)-dipyridylamine complex in acidic water, *CrystEngComm*, 2023, **25**, 6837–6844.
  - 11 L.-W. Wu, Y.-F. Yao, S.-Y. Xu, X.-Y. Cao, Y.-W. Ren, L.-P. Si and H.-Y. Liu, Electrocatalytic hydrogen evolution of transition metal (Fe, Co and Cu)–corrole complexes bearing an imidazole group, *Catalysts*, 2024, **14**, 5.
  - 12 K. Sudhakar, A. Mahammed, Q.-C. Chen, N. Fridman, B. Tumanskii and Z. Gross, Copper complexes of CF<sub>3</sub>-substituted corroles for affecting redox potentials and electrocatalysis, *ACS*

- Appl. Energy Mater.*, 2020, **3**, 2828–2836.
- 13 X. Qi, G. Yang, X. Guo, L. Si, H. Zhang and H. Liu, Electrocatalytic hydrogen evolution by water - soluble cobalt (II), copper (II) and iron (III) *meso*-tetrakis(carboxyl)porphyrin, *Eur. J. Inorg. Chem.*, 2023, **26**, e202200613.
- 14 A. M. Abudayyeh, O. Schott, H. L. C. Feltham, G. S. Hanan and S. Brooker, Copper catalysts for photo- and electro-catalytic hydrogen production, *Inorg. Chem. Front.*, 2021, **8**, 1015–1029.
- 15 V. Singh, A. M. Abudayyeh, M. G. Robb and S. Brooker, Mono-copper far more active than analogous di-copper complex for electrocatalytic hydrogen evolution, *Dalton Trans.*, 2022, **51**, 4166–4172.
- 16 A. Upadhyay, H. Meena, R. K. Jha, Kanika and S. Kumar, Isolation of monomeric copper(II) phenolate selenoether complexes using chelating *ortho* -bisphenylselenide-phenolate ligands and their electrocatalytic hydrogen gas evolution activity, *Dalton Trans.*, 2022, **51**, 7284–7293.
